# Supplementary material for: Spotted phenotypes in horses lost attractiveness in the Middle Ages
Source: PubMed Central journal article supplement (PMC5141471; doi:10.1038/srep38548), 2016-12-07
Supplement: srep38548-s1.pdf [file srep38548-s1.pdf]

## Supplementary Information

### Spotted phenotypes in horses lost attractiveness in the Middle Ages

Saskia Wutke<sup>1</sup>, Norbert Benecke<sup>2</sup>, Edson Sandoval-Castellanos<sup>3</sup>, Hans-Jürgen Döhle<sup>4</sup>, Susanne Friederich<sup>4</sup>, Javier Gonzalez<sup>5</sup>, Jón Hallsteinn Hallsson<sup>6</sup>, Michael Hofreiter<sup>5</sup>, Lembi Lõugas<sup>7</sup>, Ola Magnell<sup>8</sup>, Arturo Morales-Muniz<sup>9</sup>, Ludovic Orlando<sup>10</sup>, Albína Hulda Pálsdóttir<sup>6</sup>, Monika Reissmann<sup>11</sup>, Matej Ruttkay<sup>12</sup>, Alexandra Trinks<sup>5</sup> & Arne Ludwig<sup>1\*</sup>

<sup>1</sup> Leibniz Institute for Zoo and Wildlife Research, Department of Evolutionary Genetics, 10315 Berlin, Germany, <sup>2</sup> German Archaeological Institute, Department of Natural Sciences, Berlin, 14195 Berlin, Germany, <sup>3</sup> Centro de Ciencias de la Complejidad, Universidad Nacional Autónoma de México, Ciudad de México, Mexico, <sup>4</sup> Landesamt für Denkmalpflege und Archäologie Sachsen-Anhalt – Landesmuseum für Vorgeschichte, 06114 Halle (Saale), Germany, <sup>5</sup> University of Potsdam, Faculty of Mathematics and Natural Sciences, Institute for Biochemistry and Biology, 14476 Potsdam, Germany, <sup>6</sup> The Agricultural University of Iceland, Faculty of Land and Animal Resources, IS-112 Reykjavik, Iceland, <sup>7</sup> Archaeological Research Collection, Tallinn University, Rütli 10, 10130 Tallinn, Estonia, <sup>8</sup> National Historical Museums, Contract Archaeology, 226 60 Lund, Sweden, <sup>9</sup> Universidad Autonoma de Madrid, Laboratory of Archaeozoology, Madrid, Spain, <sup>10</sup> Centre for GeoGenetics, Natural History Museum of Denmark, University of Copenhagen, 1350K Copenhagen, Denmark, <sup>11</sup> Humboldt University Berlin, Faculty of Life Sciences, Albrecht Daniel Thaer-Institute, 10115 Berlin, Germany, <sup>12</sup> Slovak Academy of Sciences, Institute of Archaeology, 949 21 Nitra, Slovak Republic

\* To whom correspondence should be addressed. E-mail: ludwig@izw-berlin.de

## Appendix S1

### Estimating selection by simulations coupled with Markov Chain Monte Carlo

#### The model

Our goal is to estimate a set of selection coefficients (nine coefficients in a single gene/single phenotype system) plus the initial allele frequency, or alternately the age of the allele (see below). Other unknown quantities, as effective population sizes ( $N_e$ ), generation time and time to the start of the growth are relevant for the model but could not be reliably estimated so they can be considered noise variables. The empirical data, constituted by a set of allele frequencies and sample times are typically known quantities but they can also have some uncertainty. For simplicity, we'll start omitting the noise variables. In the Bayesian framework our specific goal is to approach the posterior probability density function (pdf) of the parameters of interest (hence termed  $\theta$ ) conditional to the empirical data (hence termed  $x$ ):

$$f(\theta|x) = cf(x|\theta)\pi(\theta)$$

where  $c$  is a constant and  $\pi(\theta)$  is the joint prior of the parameters. The main challenge is to estimate the likelihood,  $f(x|\theta)$ , because the relationship between  $x$  and  $\theta$  involves an allele frequencies path,  $P$ , which is unobserved and high dimensional (infinite-dimensional if the time is continuous, or  $n$ -dimensional if the timeframe has  $n$  discrete generations)<sup>1,2</sup>. This estimation has to be performed by marginalizing the likelihood by integrating upon all the possible paths;

$$f(x|\theta) = \int_P f(x|P)f(P|\theta) \quad (1)$$

This is problematic because involves solving partial differential equations or finding the joint distribution of allele frequency paths numerically<sup>1</sup>. The strategies that have been employed for addressing this problem include a continuous diffusion approximation<sup>2</sup>, a birth-death type Markov chain<sup>3</sup>, an analytic solution by the spectral representation of the transition density<sup>4</sup>, and a path augmentation method<sup>1</sup>.

Our approach sought a solution based on simulations due to the potential of simulations to deal with the complexity provided by the interaction among genes. Our approach exploited the fact that the two multiplicands in equation (1) can be estimated rather easily but in different ways, despite the intricacies of their joint integration. The first term could be calculated analytically because the empirical data consist of a series of binomial draws that are independent, so:

$$f(x|P) = \prod_{i=1}^m \binom{n_i}{k_i} p_{t_i}^{k_i} (1 - p_{t_i})^{n_i - k_i} \quad (2)$$

where  $m$  is the number of samples,  $n_i$  and  $k_i$  are the sizes and count of mutant alleles in the  $i$ -th sample respectively, and  $p_{t_i}$  the population allele frequency in the generation in which the  $i$ -th sample was taken.

Let's recall that an allele frequencies path is a series of frequencies  $P = \{p_0, p_1, \dots, p_{t_i}, \dots, p_{t_m}\}$ .

The second term in eq. (1), is the probability of a path given parameters,  $f(P|\theta)$ , and its integration can be solved using different strategies (e.g. <sup>1-5</sup>), but also explicit simulations. The most notable advantage of the simulations relies in their capacity to accommodate different sources of complexity, not only those related with intra- or inter-gene relationships (e.g. dominance or epistasis) but virtually any source of complexity, as long as it can be computer-simulated.

The novelty of our approach consists in integrating the likelihood  $f(x|\theta)$  in a hybrid method that mixes the analytical calculation of  $f(x|P)$  by means of (2) and the sampling of allele frequency paths from its distribution,  $f(P|\theta)$ , by means of simulation. The key point is that it can be done by a MCMC in which chains accept the proposal states on the basis of the incomplete likelihood provided by  $f(x|P)$  (calculated with eq. (2)) and the prior probabilities, because the remaining part of the likelihood is implicitly incorporated when the simulation of allele frequency paths are generated according with their probability. Here we have the strong assumption that the algorithm generates the allele frequency paths from  $f(P|\theta)$ , which is a reasonable assumption in our case (as we employed probed Wright-Fisher algorithms) but it would need assurance in other systems. Furthermore, the coupling with the prior distributions can be done at once by simulating the paths with parameter values that have been sampled from the prior distributions in order to directly obtain a sample from  $f(\theta|x)$ :

$$f(\theta|x) = \int_P f(x|P)f(P|\theta)\pi(\theta)$$

This method showed a notable capacity to deal with the complexities of our inferential problem. In contrast, other available methods can't deal with complicated relationships between genotypes and phenotypes, as they assign selection coefficients directly to the genotypes. From the many methods available to estimate selection from time series of genetic data, only two<sup>3,4</sup> are able to deal with dominance/recessive relationships between alleles but none is able to deal with epistatic relationships among genes. It looks also unlikely that the methods described in <sup>1-5</sup> can deal with uncertainty in samples ages which is relevant because it makes the order of the samples uncertain and with them the observed frequencies in time. Another option for inferring selection from time series of allele frequencies consist in using approximate Bayesian computation. It has the same (if not a larger) potential to deal with all the interactions and uncertainties, but it is computationally more demanding and probed incapable for the inference of our system due to the number of parameters.

### **Noise variables**

The simulated part of our model can incorporate necessary parameters for which there is neither available knowledge nor sufficient power in the data to estimate them. So the procedures include them as well as their priors and marginalize the target posterior by integrating over their ranges. The parameters that we treated in this way were the effective population sizes and the generation time:

$$f(\theta|x) = \iiint_{PN_e g} f(x|P)f(P|\theta, N_e, g)\pi(\theta, N_e, g) \partial P \partial N_e \partial g$$

The simulations sample their values from their prior distributions before inserting them in the simulations. It is important to notice that for each new noise variable, the number of simulations should be increased in the same way as if the number of parameters were increased.

### Algorithm

We implemented this algorithm in our problem of estimating selection coefficients for nine periods in a sample of 201 horses spread between the Late Pleistocene and medieval times. The algorithm has the next steps:

1. Define the proper parameters, priors and noise variables. Also define, a model and create a program for the simulation of paths of allele frequencies.
2. Sample a set of parameters  $\theta_0$  from their prior distribution  $\pi(\theta)$ .
3. Simulate an allele frequency path,  $P_i$ , using Wright-Fisher explicit simulations with the desired level of complexity and employing the values of  $\theta_i$  obtained in the previous step.
4. Calculate analytically the partial likelihood of the  $i$ -th simulation  $L_i = f(x|P_i)\pi(\theta_i)$ .
5. Use an appropriate kernel for proposing a new set  $\theta_{i+1}$ .
6. Simulate an allele frequency path,  $P_{i+1}$ , using Wright-Fisher explicit simulations with the desired level of complexity and employing the values of  $\theta_{i+1}$  obtained in the previous step.
7. Calculate analytically the partial likelihood  $L_{i+1} = f(x|P_{i+1})\pi(\theta_{i+1})$ .
8. Accept or reject  $\{P_{i+1}, \theta_{i+1}\}$  with probability  $L_{i+1} \cdot L_i^{-1}$  (or with a Metropolis-Hasting or another criterion).
9. Go to 2.
10. Repeat 1-9 for a sufficiently large number of steps.
11. Run several chains and evaluate different transition kernels. Evaluate and optimize as a regular MCMC procedure.

The algorithm is also able to incorporate some of the many refinements developed under the theory of MCMC. One of them, a Gibbs sampler could be particularly useful for highly multivariate problems. In our algorithm the Gibbs sampler updated the chains one parameter at a time.

### Initial states and introduction of alleles

The different methods that have been designed for estimating selection by means of time series of allele frequencies have dealt with the initial state of a derived allele (the one under selection) in two alternate ways: (i) the derived allele exist since the beginning of the timeframe of interest, requiring the estimation of its initial allele frequency; or (ii) considering that the mutant allele must have appeared by mutation at some time, the estimation of the initial allele frequency is substituted by the estimation of age of the allele.

Considering that our simulations are, in general, more computationally demanding than other approaches (e.g. analytic solutions), our method will generally be circumscribed to the sampling timeframe in order to minimize computational demands. For that reason, the default option will be (i). However, if the mutant allele is absent from the first sample there could be a non-null probability that the allele appeared by mutation inside the timeframe of the simulations. Opting for (i) or (ii) could be solved by performing a Bayesian model comparison between those models. However, it is possible to implement a MCMC that can jump between models in the same way that it jumps between parametric states. This has been done in phylogenetic inference for choosing models of molecular evolution on-the-go<sup>6</sup>.

In our case, the oldest sampling of the derived allele was always much younger than the oldest sample, requiring this hybrid approach.

### **Programming**

We created three versions of the algorithm: one for one-gene-systems, one for basic colours (programming the interactions between the genes ASIP and MC1R) and one with all the eight genes and their interactions.

Our program consisted in:

1. Reading data and operators for the MCMC;
2. Performing the simulations, each one consisting in:
  - a. Nested cycles for: aborting ill-conceived simulations (e.g. when alleles got prematurely extinct); cycling for parameters optimization (Gibbs sampler); and cycling for simulation of each gene's path;
  - b. Sampling ages and values of parameters from priors or jumps of the MCMC chain. Update of the likelihood;
  - c. Likelihood of the initial sample and posterior samples (inside the generations cycling);
  - d. Cycling of generations, including sections for introduction of alleles, definition of new selection coefficients at the corresponding generations, and update of the likelihoods (concerning selection coefficients);
  - e. Change of generation from binomial sampling coupled with adjustments for selection. The later ones involved calculation of allele frequencies, genotypic frequencies, augmentation by selection, sampling of the next generation and re-calculation of allele frequencies;
  - f. Instructions for the MCMC (acceptance-rejection of new state and update of the chain).
3. Organization and saving of results.

The algorithm was programmed in Microsoft Visual Studio 2015 and the Intel Parallel Studio 2013, employing the language Fortran 90. The specifics of the sampling and changes of generation followed<sup>7,8</sup>.

### **Bottom line**

Our method has several innovative steps but in its general form is analogue to the estimation of

demographic parameters by coalescent approaches<sup>9</sup>. It has been successfully tested in a simpler system, and showed more accurate than approximate Bayesian computation while being significantly more efficient (see Figure S7 & <sup>10</sup>). Such features could make this technique a useful complement of available methods not only for inferring selection but in other types of inference, especially in those in which complexity precludes the use of other approaches.

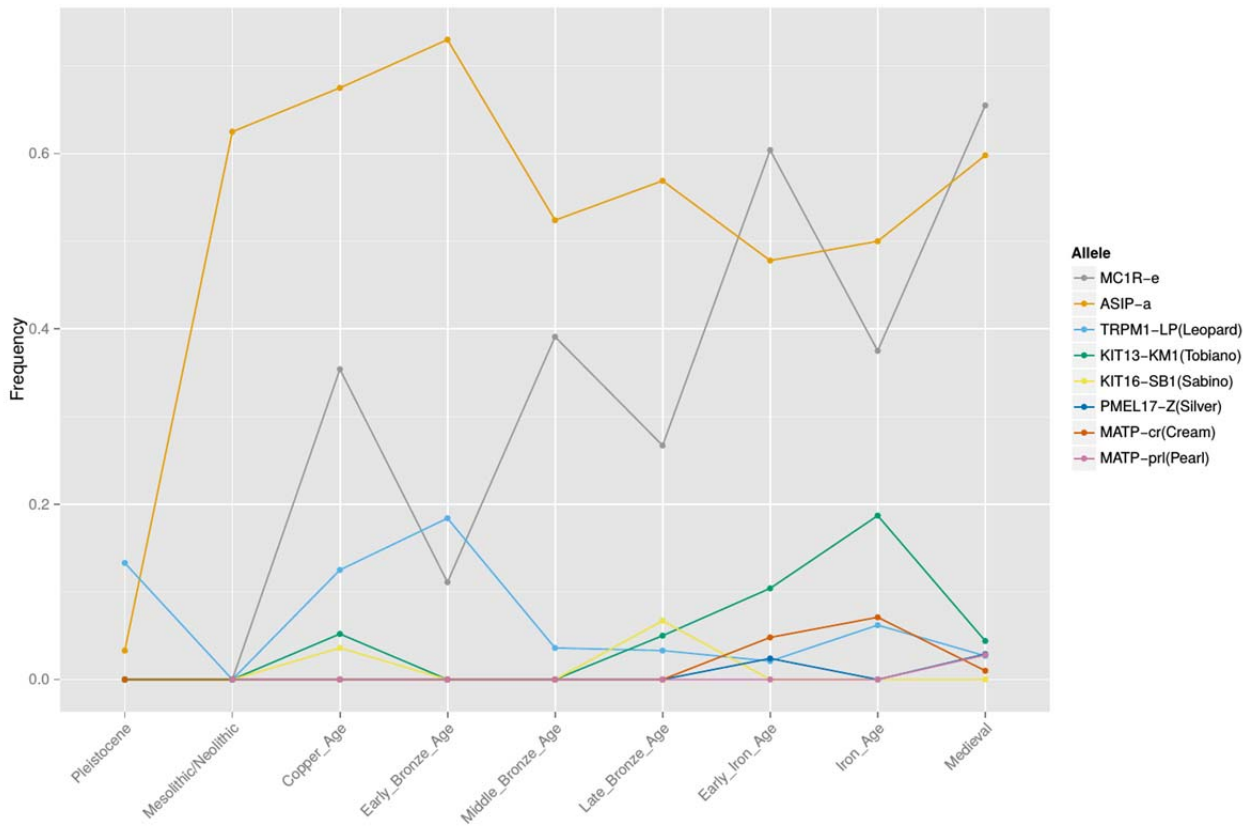

Figure S1: Allele frequencies over time of derived, non-wild-type alleles that are associated with a specific coat color phenotype.

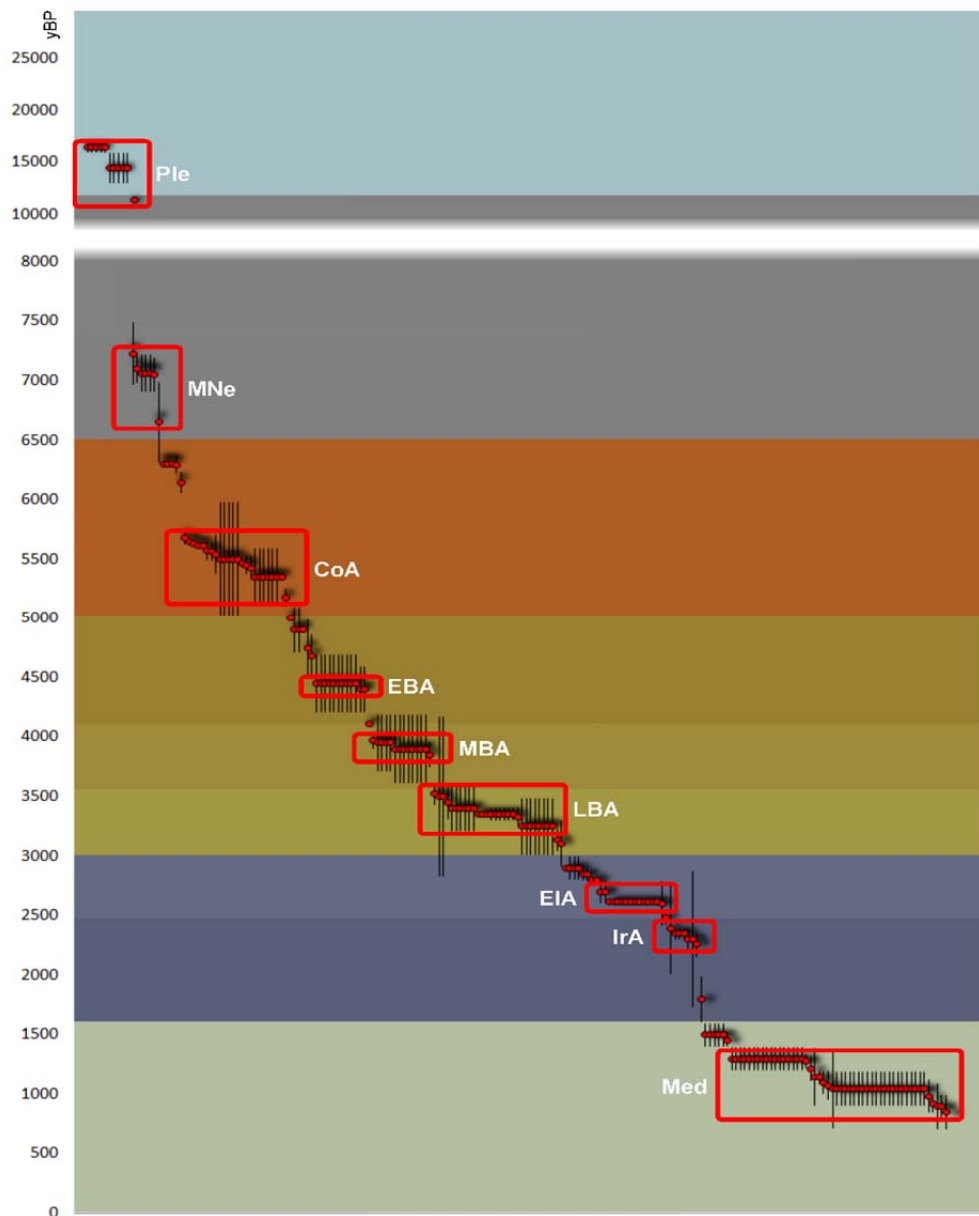

Figure S2. Grouping of samples for the temporal test of allele frequencies. Only the samples inside boxes were included in the test. Notice that the temporal scale changes and is discontinuous for the Pleistocene.



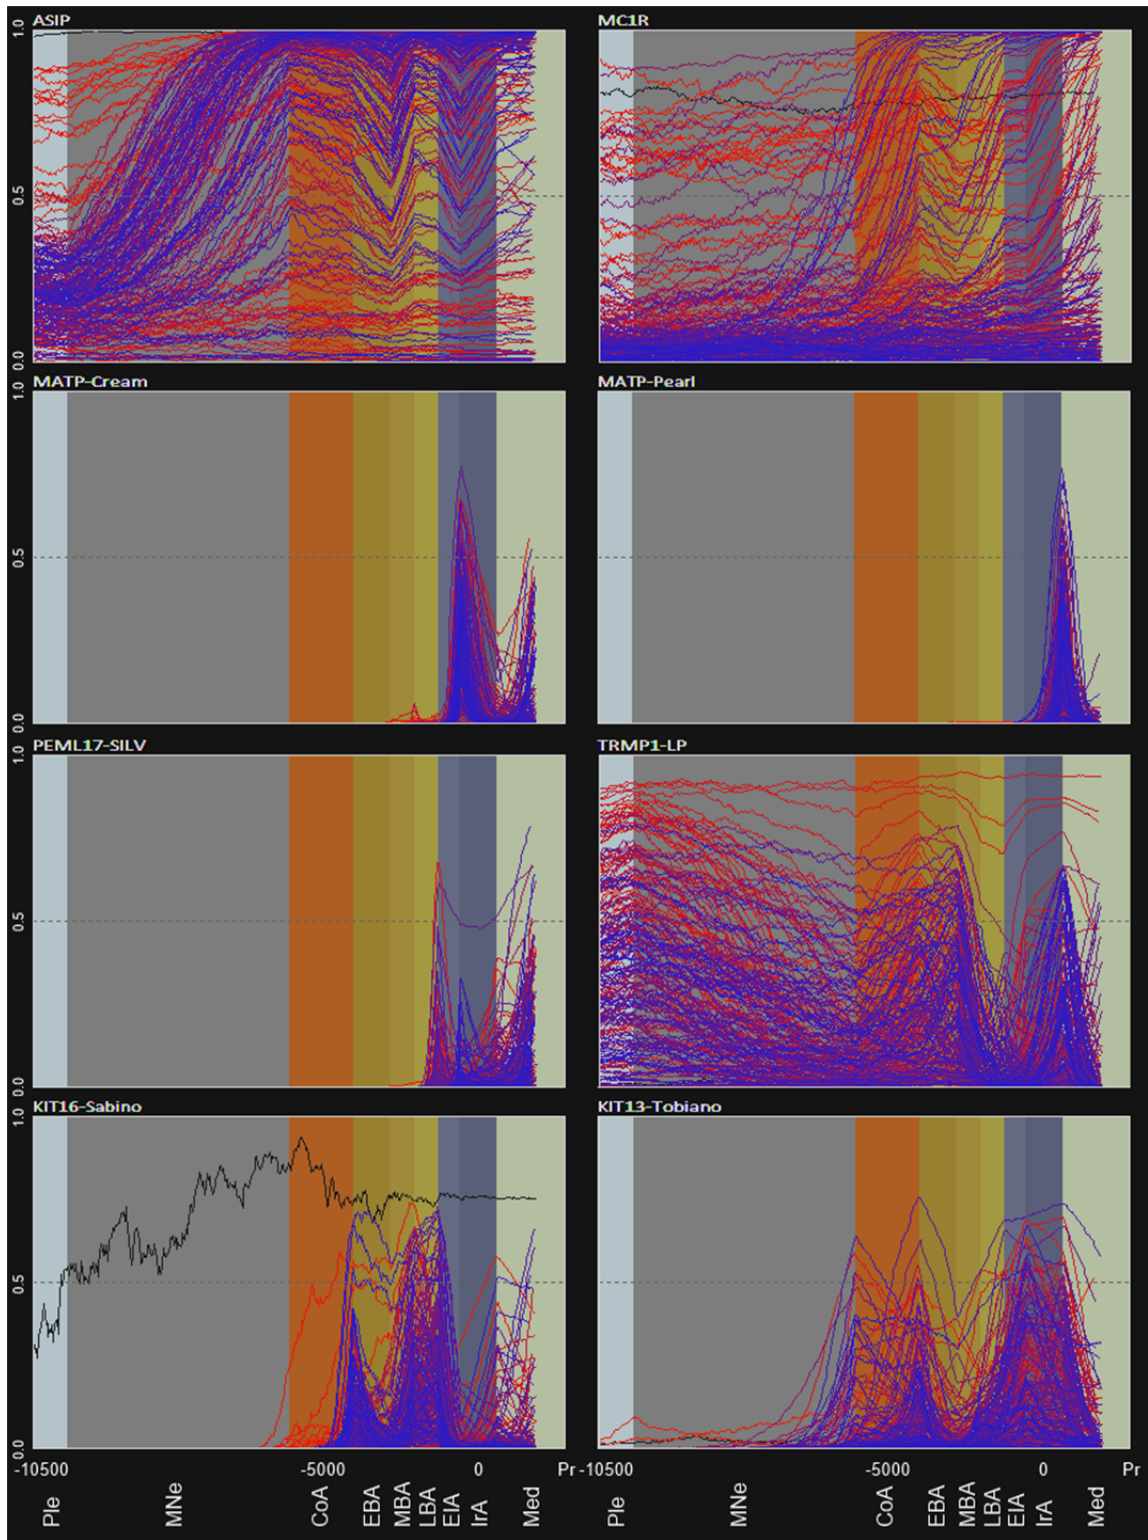

Figure S3: Time trajectories of the allele frequencies in eight genes involved in horse coat color. The frequencies correspond to the derived allele. The codes for the nine time periods indicated at the bottom and with different colors in the background correspond to: Ple=Pleistocene; MNe=Mesolithic-Neolithic; CoA=Copper Age; EBA=Early Bronze Age; MBE=Middle Bronze Age; LBA=Late Bronze Age; EIA=Early Iron Age; IrA=Iron Age; and Med=Medieval (see details in the main text). The time frame ranges from 12.5 ky BP to present (from left to right); most of Pleistocene was omitted for visualization purposes. Each line corresponds to one simulation and the color black corresponds to the initial simulation, the red to simulations of the burnin stage of the MCMC, and blue to simulations employed for the inference.

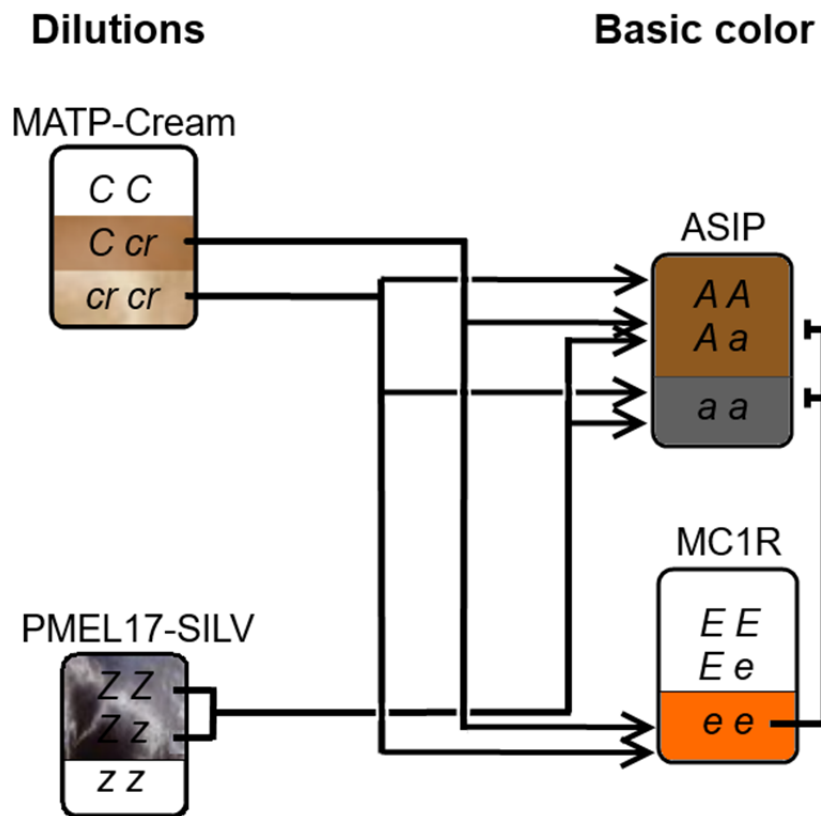

Figure S4. Relationships among phenotypes and genotypes associated to two dilution genes and two basic colors genes. The arrows mean that a dilution gene can only be expressed in the specific color the arrow are directed to (notice that, for instance, cream heterozygotes, *C/cr*, cannot be expressed in black horses, ASIP *a/a*). The t-shape ending of the lines mean that the indicated phenotypes are dominant-repressed by the genotype they come from. The genes that doesn't appear in the figure, KIT13-Tobiano, KIT16-Sabino, MATP-Pearl and TRPM1-LP present phenotypes equivalent regardless the basic color and only present relationships of dominance between alleles of the same gene.

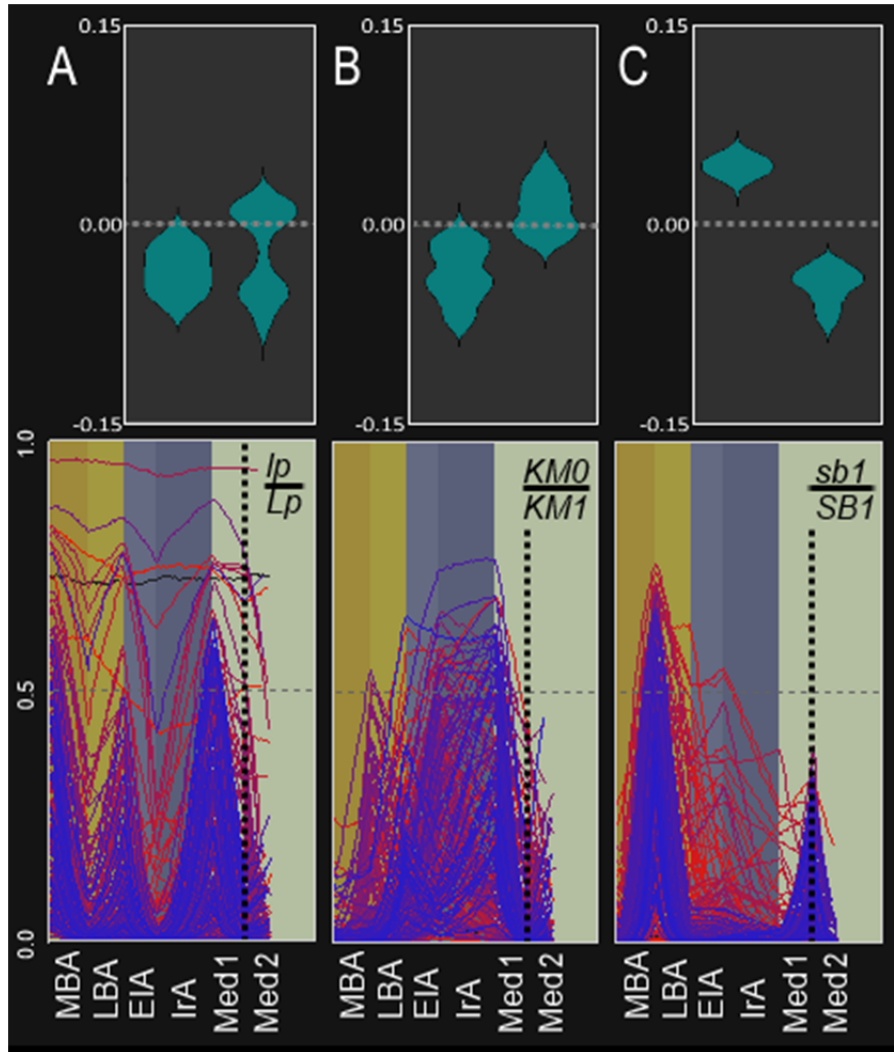

Figure S5. Violin plots of selection coefficients and paths of allele frequencies when the Medieval period was split. The upper panels represent the violin plots of the selection coefficients in the periods Med1 and Med2 (early and late Medieval respectively). The lower panels show the path of allele frequencies; the vertical dotted line divides the Med1 and Med2 periods. A, B, C are for the loci TRPM1-LP (leopard), KIT13-Tobiano and KIT16-Sabino respectively. Unexpectedly, the split not always translated in the later medieval period having a negative selection coefficient (as in C), but in all cases the result was a strong depletion of the derived (spotting) allele due to negative selection.

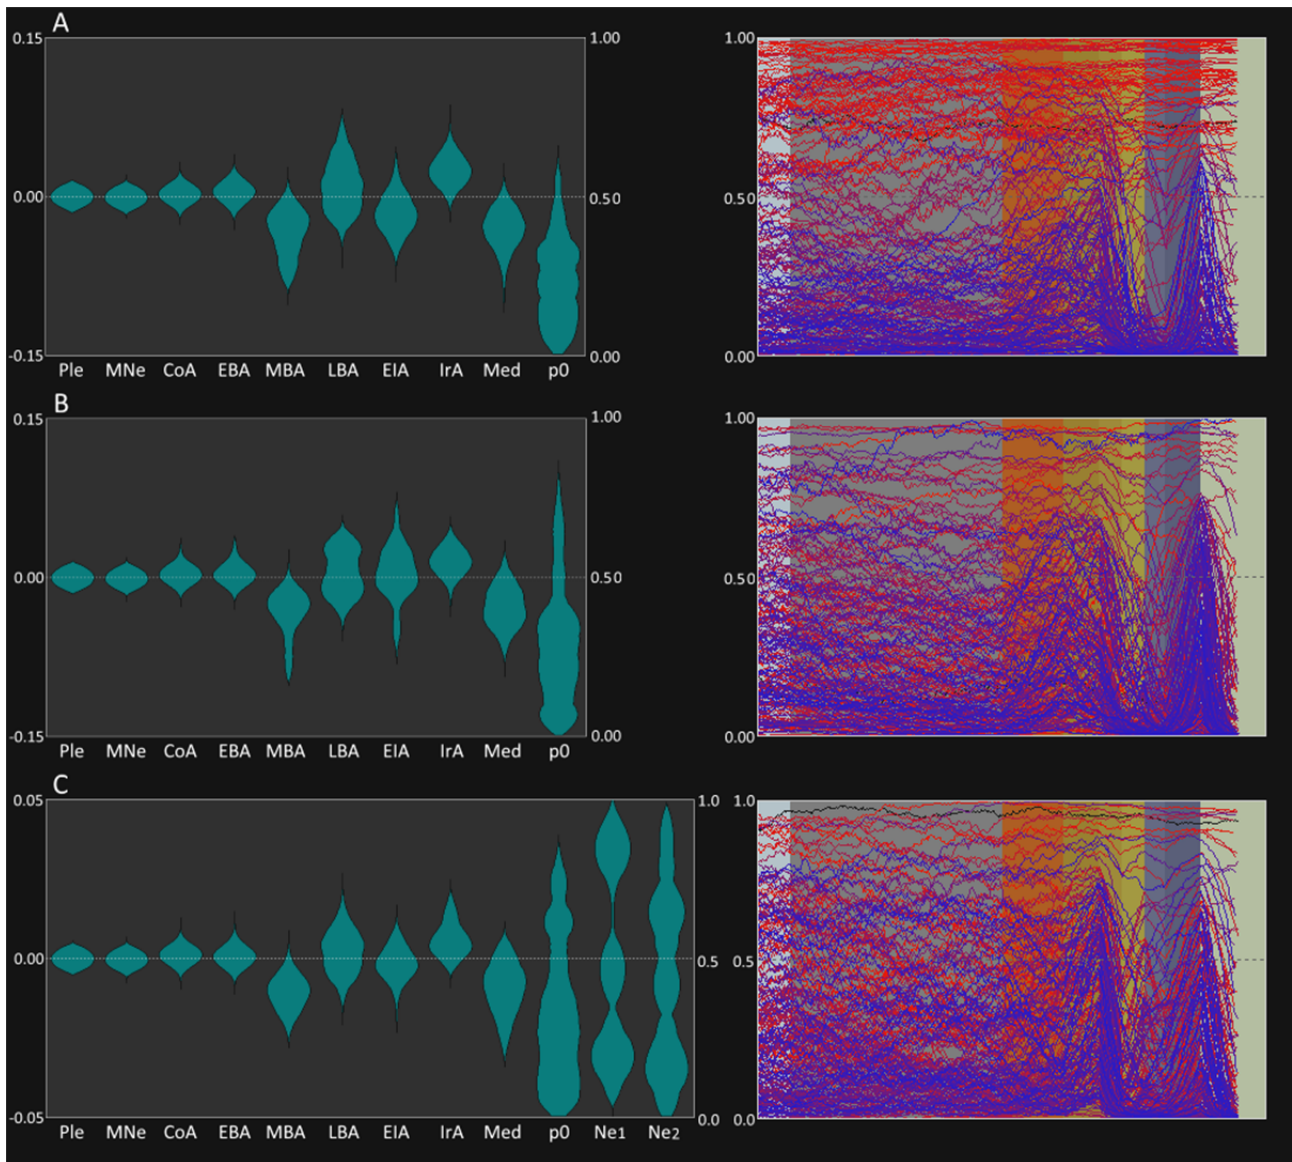

Figure S6. Violin plots of the posterior distributions of parameters (left) and allele frequencies paths (right) as inferred by three types of analyses. (A) The analysis considering a demographic growth starting around the time of the onset of domestication; (B) the analysis with a constant effective population size from the Pleistocene to the Medieval period; (C) the analyses in which  $g$ ,  $Ne1$ ,  $Ne2$  and the time of the start of the growth were treated as parameters instead of noise variables.

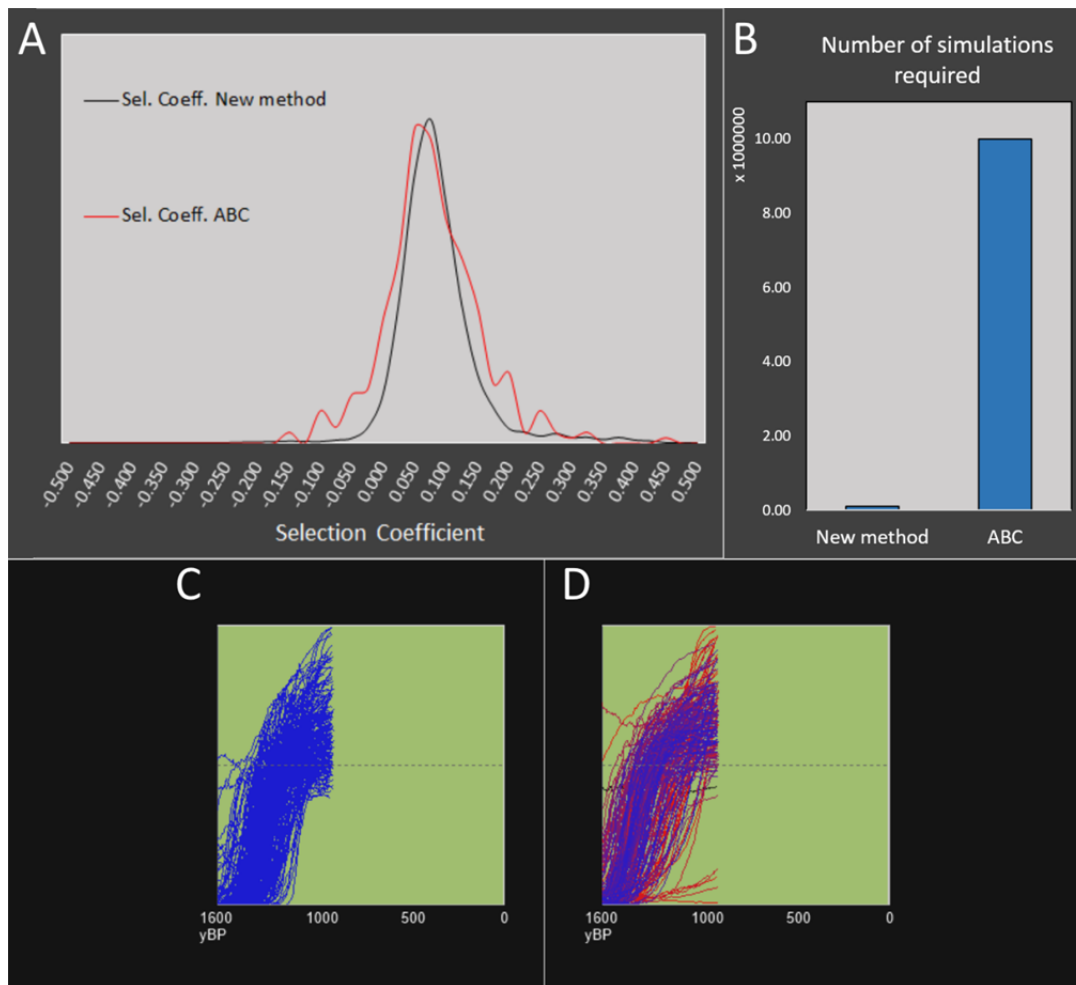

Figure S7. Comparison between the simulation-MCMC and approximate Bayesian computation (ABC). This figure was modified from <sup>10</sup> in a study with many similarities of our own, including the analysis, by means of ancient DNA, of a derived mutation presumably favored by artificial selection in horses. However, the analysis only attained a single period resulting in a much lower dimensionality. (A) Shows the posterior probability distribution of the selection coefficient with ABC and with the simulation-MCMC. (B) shows the number of simulations required for the inference. (C) and (D) show the inferred allele frequency paths obtained by ABC and the simulation-MCMC respectively. The colors in (D) represent the progression of the MCMC showing the initial steps of the chain in red and the latest in blue.

Table S1: Sample information and genotyping results for all successfully typed horses.

|                                  | Sample             | Age                |                   | Location                        | Excavation                      | Wild/<br>Domestic                    | Phenotype    |              |                  | Genotype |           |               |              |            |            |         |             |          |       |       |
|----------------------------------|--------------------|--------------------|-------------------|---------------------------------|---------------------------------|--------------------------------------|--------------|--------------|------------------|----------|-----------|---------------|--------------|------------|------------|---------|-------------|----------|-------|-------|
|                                  |                    | Stratigraphic date | 14C date          |                                 |                                 |                                      | Basic        | Pattern      | Dilution         | ASIP     | EDNRB     | KIT13-Tobiano | KIT16-Sabino | MATP-Cream | MATP-Pearl | MC1R    | PMEL17-SILV | TRPM1-LP |       |       |
|                                  |                    |                    |                   |                                 |                                 |                                      |              |              |                  |          |           |               |              |            |            |         |             |          |       |       |
| Pleistocene/Neolithic/Copper_Age | Asia               | SP1181A            | 39.460±400BP      |                                 | Siberia                         | Maliy Lyakhovskiy Isl.               | W            | Bay          | -                | -        | A/A       | ov/ov         | K/MO/K/MO    | sb1/sb1    | C/C        | N/A     | E/E         | z/z      | lp/lp |       |
|                                  |                    | SP1181B            | Late Pleistocene  |                                 | Siberia                         | Bol'shoy Lyakhovskiy Isl.            | W            | Bay          | -                | -        | A/A       | ov/ov         | K/MO/K/MO    | sb1/sb1    | C/C        | N/A     | E/E         | z/z      | lp/lp |       |
|                                  |                    | SP1181C            | Late Pleistocene  |                                 | Siberia                         | Bol'shoy Lyakhovskiy Isl.            | W            | Bay          | -                | -        | A/A       | ov/ov         | K/MO/K/MO    | sb1/sb1    | C/C        | N/A     | E/E         | z/z      | lp/lp |       |
|                                  |                    | SP1181E            | Late Pleistocene  |                                 | Siberia                         | Oyagosskiy Yar, Kondrat'ev R., mouth | W            | Bay          | -                | -        | A/A       | ov/ov         | K/MO/K/MO    | sb1/sb1    | C/C        | N/A     | E/E         | z/z      | lp/lp |       |
|                                  |                    | SP1181F            | Late Pleistocene  |                                 | Siberia                         | Kotel'niy Isl., Anisiy Cape          | W            | Bay          | -                | -        | A/A       | ov/ov         | K/MO/K/MO    | sb1/sb1    | C/C        | N/A     | E/E         | z/z      | lp/lp |       |
|                                  |                    | 874-9              | 4000-3000 BC      |                                 | Siberia                         | Krasnokamenka                        | D            | Bay          | -                | -        | A/A       | ov/ov         | K/MO/K/MO    | sb1/sb1    | C/C        | N/A     | E/E         | z/z      | lp/lp |       |
|                                  |                    | 874-4              | 4000-3000 BC      |                                 | Siberia                         | Krasnokamenka                        | D            | Bay          | Sabino + Leopard | -        | -         | A/A           | ov/ov        | K/MO/K/MO  | SB1/sb1    | C/C     | N/A         | E/E      | z/z   | LP/lp |
|                                  |                    | 876-8              | 4000-3000 BC      |                                 | Siberia                         | Krasnokamenka                        | D            | Bay          | -                | -        | A/A       | ov/ov         | K/MO/K/MO    | sb1/sb1    | C/C        | N/A     | E/E         | z/z      | lp/lp |       |
|                                  |                    | 874-11             | 4000-3000 BC      |                                 | Siberia                         | Krasnokamenka                        | D            | Chestnut     | -                | -        | a/a       | ov/ov         | K/MO/K/MO    | sb1/sb1    | C/C        | N/A     | e/e         | z/z      | lp/lp |       |
|                                  |                    | 874-6              | 4000-3000 BC      |                                 | Siberia                         | Krasnokamenka                        | D            | Bay          | Sabino + Leopard | -        | -         | A/A           | ov/ov        | K/MO/K/MO  | SB1/sb1    | C/C     | N/A         | E/E      | z/z   | LP/lp |
|                                  |                    | 715-625            | 3600-3000 BC      |                                 | Kazakhstan                      | Botai                                | D            | Bay          | -                | -        | A         | ov/ov         | K/MO/K/MO    | sb1/sb1    | C/C        | N/A     | E           | z/z      | lp/lp |       |
|                                  |                    | 715-660            |                   | cal. 3503-3428 BC               | Kazakhstan                      | Botai                                | D            | Bay          | -                | -        | A         | ov/ov         | K/MO/K/MO    | sb1/sb1    | C/C        | N/A     | E           | z/z      | lp/lp |       |
|                                  |                    | 715-700            | 3600-3000 BC      |                                 | Kazakhstan                      | Botai                                | D            | Bay          | -                | -        | A         | ov/ov         | K/MO/K/MO    | sb1/sb1    | C/C        | N/A     | E           | z/z      | lp/lp |       |
|                                  |                    | 715-1487           | 3600-3000 BC      |                                 | Kazakhstan                      | Botai                                | D            | Bay          | -                | -        | A         | ov/ov         | K/MO/K/MO    | sb1/sb1    | C/C        | N/A     | E           | z/z      | lp/lp |       |
|                                  |                    | 715-1547           | 3600-3000 BC      |                                 | Kazakhstan                      | Botai                                | D            | Bay          | -                | -        | A         | ov/ov         | K/MO/K/MO    | sb1/sb1    | C/C        | N/A     | E           | z/z      | lp/lp |       |
|                                  |                    | 715-2514           |                   | cal. 3621-3610 BC               | Kazakhstan                      | Botai                                | D            | Bay          | Leopard          | -        | -         | A             | ov/ov        | K/MO/K/MO  | sb1/sb1    | C/C     | N/A         | E        | z/z   | LP/lp |
|                                  |                    | 715-2661           | 3600-3000 BC      |                                 | Kazakhstan                      | Botai                                | D            | Bay          | -                | -        | A         | ov/ov         | K/MO/K/MO    | sb1/sb1    | C/C        | N/A     | E           | z/z      | lp/lp |       |
|                                  |                    | 715-494            |                   | cal. 3620-3611 BC               | Kazakhstan                      | Botai                                | D            | Bay          | Leopard          | -        | -         | A             | ov/ov        | K/MO/K/MO  | sb1/sb1    | C/C     | N/A         | E        | z/z   | LP/lp |
|                                  |                    | 715-705            |                   | cal. 3654-3630 BC               | Kazakhstan                      | Botai                                | D            | Bay          | Tobiano          | -        | -         | A             | ov/ov        | K/M1/K/MO  | sb1/sb1    | C/C     | N/A         | E        | z/z   | lp/lp |
|                                  | 715-1496           |                    | cal. 3644-3619 BC | Kazakhstan                      | Botai                           | D                                    | Bay          | -            | -                | A        | ov/ov     | K/MO/K/MO     | sb1/sb1      | C/C        | N/A        | E       | z/z         | lp/lp    |       |       |
|                                  | 1427-59            |                    | cal. 2920-2878 BC | Siberia                         | Alexandrovskoe IV               | D                                    | Black        | -            | -                | a/a      | ov/ov     | K/MO/K/MO     | sb1/sb1      | C/C        | N/A        | E/E     | z/z         | lp/lp    |       |       |
|                                  | BER1               | 3000 BC            |                   | Siberia                         | Denisova-Pescera                | D                                    | Chestnut     | -            | -                | A/A      | ov/ov     | K/MO/K/MO     | sb1/sb1      | C/C        | N/A        | e/e     | z/z         | lp/lp    |       |       |
|                                  | Europe/Asia(minor) | PET6               | 14000-11000 BC    |                                 | Germany                         | Petersfels                           | W            | Bay          | Leopard          | -        | -         | A/A           | ov/ov        | K/MO/K/MO  | sb1/sb1    | C/C     | N/A         | E/E      | z/z   | LP/lp |
|                                  |                    | PET5               | 14000-11000 BC    |                                 | Germany                         | Petersfels                           | W            | Bay          | Leopard          | -        | -         | A/a           | ov/ov        | K/MO/K/MO  | sb1/sb1    | C/C     | N/A         | E/E      | z/z   | LP/lp |
|                                  |                    | PET3               | 14000-11000 BC    |                                 | Germany                         | Petersfels                           | W            | Bay          | -                | -        | A/A       | ov/ov         | K/MO/K/MO    | sb1/sb1    | C/C        | N/A     | E/E         | z/z      | lp/lp |       |
|                                  |                    | PET2               | 14000-11000 BC    |                                 | Germany                         | Petersfels                           | W            | Bay          | -                | -        | A/A       | ov/ov         | K/MO/K/MO    | sb1/sb1    | C/C        | N/A     | E/E         | z/z      | lp/lp |       |
|                                  |                    | PET1               | 14000-11000 BC    |                                 | Germany                         | Petersfels                           | W            | Bay          | Leopard          | -        | -         | A/A           | ov/ov        | K/MO/K/MO  | sb1/sb1    | C/C     | N/A         | E/E      | z/z   | LP/lp |
|                                  |                    | KG5                | 15000-14000 BC    |                                 | Germany                         | Kniegrotte                           | W            | Bay          | Leopard          | -        | -         | A/A           | ov/ov        | K/MO/K/MO  | sb1/sb1    | C/C     | N/A         | E/E      | z/z   | LP/lp |
|                                  |                    | KG4                | 15000-14000 BC    |                                 | Germany                         | Kniegrotte                           | W            | Bay          | -                | -        | A/A       | ov/ov         | K/MO/K/MO    | sb1/sb1    | C/C        | N/A     | E/E         | z/z      | lp/lp |       |
|                                  |                    | KG3                | 15000-14000 BC    |                                 | Germany                         | Kniegrotte                           | W            | Bay          | -                | -        | A/A       | ov/ov         | K/MO/K/MO    | sb1/sb1    | C/C        | N/A     | E/E         | z/z      | lp/lp |       |
|                                  |                    | KG2                | 15000-14000 BC    |                                 | Germany                         | Kniegrotte                           | W            | Bay          | -                | -        | A/A       | ov/ov         | K/MO/K/MO    | sb1/sb1    | C/C        | N/A     | E/E         | z/z      | lp/lp |       |
|                                  |                    | KG1                | 15000-14000 BC    |                                 | Germany                         | Kniegrotte                           | W            | Bay          | -                | -        | A/A       | ov/ov         | K/MO/K/MO    | sb1/sb1    | C/C        | N/A     | E/E         | z/z      | lp/lp |       |
|                                  |                    | Pie05              | 4300 BC           |                                 | Romania                         | Pietrele                             | W            | Bay OR Black | -                | -        | N/A       | ov/ov         | K/MO/K/MO    | sb1/sb1    | C/C        | PRL/PRL | E/E         | z/z      | lp/lp |       |
|                                  |                    | Pie06              | 4300 BC           |                                 | Romania                         | Pietrele                             | W            | Bay OR Black | Leopard          | -        | -         | N/A           | ov/ov        | K/MO/K/MO  | sb1/sb1    | C/C     | PRL/PRL     | E/E      | z/z   | LP/lp |
|                                  |                    | PIE9               | 4300 BC           |                                 | Romania                         | Pietrele                             | W            | Black        | -                | -        | a/a       | ov/ov         | K/MO/K/MO    | sb1/sb1    | C/C        | N/A     | E/e         | z/z      | lp/lp |       |
|                                  |                    | Spa1               |                   | cal. 9390-9210 BC               | Ukraine                         | Span-Koba                            | W            | Bay          | -                | -        | A/A       | ov/ov         | K/MO/K/MO    | sb1/sb1    | C/C        | N/A     | E/E         | z/z      | lp/lp |       |
|                                  |                    | VIT4               |                   | cal. 4360-4220 BC               | Romania                         | Vitanesti                            | W            | Black        | -                | -        | a/a       | ov/ov         | K/MO/K/MO    | sb1/sb1    | C/C        | N/A     | E/E         | z/z      | lp/lp |       |
|                                  |                    | Zeg2               |                   | 5354 – 5285 BC                  | Poland                          | Zegotki 5                            | W            | Bay          | -                | -        | A/a       | ov/ov         | K/MO/K/MO    | sb1/sb1    | C/C        | N/A     | E/E         | z/z      | N/A   |       |
|                                  |                    | GRO11              | 3100-2700 BC      |                                 | Germany                         | Großbröngen                          | D            | Black        | -                | -        | a/a       | ov/ov         | K/MO/K/MO    | sb1/sb1    | C/C        | N/A     | E           | z/z      | lp/lp |       |
| Salz1                            |                    |                    | cal. 3368-3101 BC | Germany                         | Salzmünde, SK                   | D                                    | Bay OR Black | Tobiano      | -                | -        | N/A       | ov/ov         | K/M1/K/M1    | sb1/sb1    | C/C        | N/A     | E/E         | z/z      | lp/lp |       |
| Wes1                             |                    | 3100-2700 BC       |                   | Germany                         | Westerhausen, HK                | D                                    | Bay          | -            | -                | A/a      | ov/ov     | K/MO/K/MO     | sb1/sb1      | C/C        | PRL/PRL    | E/E     | z/z         | lp/lp    |       |       |
| Wes2                             |                    | 3100-2700 BC       |                   | Germany                         | Westerhausen, HK                | D                                    | Bay          | -            | -                | A/a      | ov/ov     | K/MO/K/MO     | sb1/sb1      | C/C        | PRL/PRL    | E/E     | z/z         | lp/lp    |       |       |
| TIS2                             | 3000-2500 BC       |                    | Hungary           | Tiszalúc-Sarkad                 | W                               | Bay OR Black                         | -            | -            | N/A              | ov/ov    | K/MO/K/MO | sb1/sb1       | C/C          | PRL/PRL    | E/E        | z/z     | lp/lp       |          |       |       |
| CAS1                             |                    | cal. 3700-3380 BC  | Romania           | Cascioarele                     | W                               | Black                                | -            | -            | a/a              | ov/ov    | K/MO/K/MO | sb1/sb1       | C/C          | N/A        | E/E        | z/z     | lp/lp       |          |       |       |
| MAY1                             | 3600-3100 BC       |                    | Ukraine           | Mayaki                          | W                               | Bay OR Black                         | -            | -            | N/A              | N/A      | K/MO/K/MO | N/A           | N/A          | PRL/PRL    | E/E        | z/z     | lp/lp       |          |       |       |
| MAY3                             |                    | cal. 3640-3490 BC  | Ukraine           | Mayaki                          | W                               | Bay                                  | -            | -            | A/a              | ov/ov    | K/MO/K/MO | sb1/sb1       | C/C          | N/A        | E/E        | z/z     | lp/lp       |          |       |       |
| MAY5                             |                    | cal. 3250-3100 BC  | Ukraine           | Mayaki                          | W                               | Bay                                  | -            | -            | A/a              | ov/ov    | K/MO/K/MO | sb1/sb1       | C/C          | N/A        | E/E        | z/z     | lp/lp       |          |       |       |
| MAY6                             |                    | cal. 3520-3330 BC  | Ukraine           | Mayaki                          | W                               | Bay                                  | -            | -            | A/a              | ov/ov    | K/MO/K/MO | sb1/sb1       | C/C          | N/A        | E/E        | z/z     | lp/lp       |          |       |       |
| MAY7                             |                    | cal. 3520-3380 BC  | Ukraine           | Mayaki                          | W                               | Bay                                  | Leopard      | -            | -                | A/a      | ov/ov     | K/MO/K/MO     | sb1/sb1      | C/C        | N/A        | E/E     | z/z         | LP/lp    |       |       |
| MAY10                            |                    | cal. 3650-3500 BC  | Ukraine           | Mayaki                          | W                               | Bay                                  | Leopard      | -            | -                | A/a      | ov/ov     | K/MO/K/MO     | sb1/sb1      | C/C        | N/A        | E/E     | z/z         | LP/lp    |       |       |
| MOL5                             | 3720-3630 BC       |                    | Ukraine           | Molyukhov Bugor                 | W                               | Black                                | -            | -            | a/a              | ov/ov    | K/MO/K/MO | sb1/sb1       | C/C          | N/A        | E/E        | z/z     | lp/lp       |          |       |       |
| Iberia                           | 44                 | 5500-4950 BC       |                   | Spain                           | Atxoste                         | W                                    | Bay          | -            | -                | A/a      | ov/ov     | K/MO/K/MO     | sb1/sb1      | C/C        | N/A        | E/E     | z/z         | lp/lp    |       |       |
|                                  | 3                  | 5200-4900 BC       |                   | Spain                           | Cueva Fosca -Valencia-Cartellon | W                                    | Black        | -            | -                | a/a      | ov/ov     | K/MO/K/MO     | sb1/sb1      | C/C        | N/A        | E/E     | z/z         | lp/lp    |       |       |
|                                  | 31                 |                    | cal. 5210-4910 BC | Spain                           | Cueva Fosca -Valencia-Cartellon | W                                    | Bay          | -            | -                | A/a      | ov/ov     | K/MO/K/MO     | sb1/sb1      | C/C        | N/A        | E/E     | z/z         | lp/lp    |       |       |
|                                  | 32                 |                    | cal. 5220-4980 BC | Spain                           | Cueva Fosca -Valencia-Cartellon | W                                    | Black        | -            | -                | a/a      | ov/ov     | K/MO/K/MO     | sb1/sb1      | C/C        | N/A        | E/E     | z/z         | lp/lp    |       |       |
|                                  | 34                 | 5220-4900 BC       |                   | Spain                           | Cueva Fosca -Valencia-Cartellon | W                                    | Bay          | -            | -                | a/a      | ov/ov     | K/MO/K/MO     | sb1/sb1      | C/C        | N/A        | E/E     | z/z         | lp/lp    |       |       |
| 37                               |                    | cal. 5210-4910 BC  | Spain             | Cueva Fosca -Valencia-Cartellon | W                               | Bay                                  | -            | -            | A/a              | ov/ov    | K/MO/K/MO | sb1/sb1       | C/C          | N/A        | E/E        | z/z     | lp/lp       |          |       |       |

Table S1: continued.

|                    | Sample             | Age         | Location          | Excavation                  | Wild/<br>Domestic       | Phenotype |              |         | Genotype |         |         |         |         |         |         |         |       |       |       |       |
|--------------------|--------------------|-------------|-------------------|-----------------------------|-------------------------|-----------|--------------|---------|----------|---------|---------|---------|---------|---------|---------|---------|-------|-------|-------|-------|
| Bronze_Age_early   | Asia               | 270-71      | cal. 2031-1905 BC | Siberia                     | Kulivchi III            | D         | Black        | -       | -        | a/a     | ov/bv   | KM0/KM0 | sb1/sb1 | C/C     | N/A     | E       | z/z   | lp/lp |       |       |
|                    |                    | 270-88      |                   | Siberia                     | Kulivchi III            | D         | Bay          | -       | -        | A       | ov/bv   | KM0/KM0 | sb1/sb1 | C/C     | N/A     | E       | z/z   | lp/lp |       |       |
|                    |                    | 838-42      |                   | Siberia                     | Sintashta               | D         | Bay          | -       | -        | A       | ov/bv   | KM0/KM0 | sb1/sb1 | C/C     | N/A     | E       | z/z   | lp/lp |       |       |
|                    |                    | 838-45      |                   | Siberia                     | Sintashta               | D         | Bay          | -       | -        | A       | ov/bv   | KM0/KM0 | sb1/sb1 | C/C     | N/A     | E       | z/z   | lp/lp |       |       |
|                    |                    | 838-64      |                   | Siberia                     | Sintashta               | D         | Bay          | -       | -        | A       | ov/bv   | KM0/KM0 | sb1/sb1 | C/C     | N/A     | E       | z/z   | lp/lp |       |       |
|                    |                    | 838-66      |                   | Siberia                     | Sintashta               | D         | Black        | -       | -        | a/a     | ov/bv   | KM0/KM0 | sb1/sb1 | C/C     | N/A     | E       | z/z   | lp/lp |       |       |
|                    | Europe/Asia(minor) | KAN21       | 2700-2200 BC      | Turkey                      | Kirklareli-Kanligecit   | D         | Black        | Leopard | -        | a/a     | ov/bv   | KM0/KM0 | sb1/sb1 | C/C     | N/A     | E/E     | z/z   | LP/lp |       |       |
|                    |                    | KAN22       | 2700-2200 BC      | Turkey                      | Kirklareli-Kanligecit   | D         | Black        | -       | -        | a/a     | ov/bv   | KM0/KM0 | sb1/sb1 | C/C     | N/A     | E/E     | z/z   | lp/lp |       |       |
|                    |                    | KAN26       | 2700-2200 BC      | Turkey                      | Kirklareli-Kanligecit   | D         | Bay          | Leopard | -        | A/a     | ov/bv   | KM0/KM0 | sb1/sb1 | C/C     | N/A     | E/E     | z/z   | LP/lp |       |       |
|                    |                    | KAN27       | 2700-2200 BC      | Turkey                      | Kirklareli-Kanligecit   | D         | Black        | Leopard | -        | a/a     | ov/bv   | KM0/KM0 | sb1/sb1 | C/C     | N/A     | E/E     | z/z   | LP/lp |       |       |
|                    |                    | KAN28       | 2700-2200 BC      | Turkey                      | Kirklareli-Kanligecit   | D         | Bay          | Leopard | -        | a/a     | ov/bv   | KM0/KM0 | sb1/sb1 | C/C     | N/A     | E/E     | z/z   | LP/LP |       |       |
|                    |                    | KAN29       | 2700-2200 BC      | Turkey                      | Kirklareli-Kanligecit   | D         | Black        | Leopard | -        | a/a     | ov/bv   | KM0/KM0 | sb1/sb1 | C/C     | N/A     | E/E     | z/z   | LP/lp |       |       |
|                    |                    | KAN30       | 2700-2200 BC      | Turkey                      | Kirklareli-Kanligecit   | D         | Bay          | -       | -        | A/a     | ov/bv   | KM0/KM0 | sb1/sb1 | C/C     | N/A     | E/E     | z/z   | lp/lp |       |       |
|                    |                    | KAN31       | 2700-2200 BC      | Turkey                      | Kirklareli-Kanligecit   | D         | Black        | -       | -        | a/a     | ov/bv   | KM0/KM0 | sb1/sb1 | C/C     | N/A     | E/E     | z/z   | lp/lp |       |       |
|                    |                    | KAN32       | 2700-2200 BC      | Turkey                      | Kirklareli-Kanligecit   | D         | Bay          | Leopard | -        | A/a     | ov/bv   | KM0/KM0 | sb1/sb1 | C/C     | N/A     | E/E     | z/z   | LP/lp |       |       |
|                    |                    | KAN33       | 2700-2200 BC      | Turkey                      | Kirklareli-Kanligecit   | D         | Black        | -       | -        | a/a     | ov/bv   | KM0/KM0 | sb1/sb1 | C/C     | N/A     | E/E     | z/z   | lp/lp |       |       |
|                    |                    | Lor1        | cal. 1950-1750 BC | Georgia                     | Lori-Berd               | D         | Bay          | -       | -        | A/a     | ov/bv   | KM0/KM0 | sb1/sb1 | C/C     | N/A     | E/E     | z/z   | lp/lp |       |       |
|                    |                    | Svi6        |                   | Germany                     | Schloßvippach (Fpl. 51) | D         | Bay          | -       | -        | A/a     | ov/bv   | KM0/KM0 | sb1/sb1 | C/C     | N/A     | E/E     | z/z   | lp/lp |       |       |
|                    |                    | Alb2        |                   | Hungary                     | Alberfalva              | D         | Bay          | Leopard | -        | -       | A/a     | ov/bv   | KM0/KM0 | sb1/sb1 | C/C     | N/A     | E/e   | z/z   | LP/lp |       |
|                    |                    | TID2        |                   | Hungary                     | Tiszalúc-Dankadomb      | D         | Bay OR Black | -       | -        | -       | N/A     | ov/bv   | KM0/KM0 | sb1/sb1 | C/C     | PRL/PRL | E/E   | z/z   | lp/lp |       |
|                    |                    | Bru4        |                   | Poland                      | Bruszczewo Fpl. 5       | D         | Bay          | -       | -        | -       | A/a     | ov/bv   | KM0/KM0 | sb1/sb1 | C/C     | PRL/PRL | E/E   | z/z   | lp/lp |       |
|                    |                    | MK01        |                   | Slovakia                    | Malé Kosihy             | D         | Chestnut     | -       | -        | -       | A/a     | ov/bv   | KM0/KM0 | sb1/sb1 | C/C     | N/A     | e/e   | z/z   | lp/lp |       |
|                    |                    | MK02        |                   | Slovakia                    | Malé Kosihy             | D         | Bay          | -       | -        | -       | A/a     | ov/bv   | KM0/KM0 | sb1/sb1 | C/C     | PRL/PRL | E/E   | z/z   | lp/lp |       |
|                    |                    | NHr2        |                   | Slovakia                    | Nitriansky Hradok       | D         | Bay OR Black | -       | -        | -       | N/A     | ov/bv   | KM0/KM0 | sb1/sb1 | C/C     | N/A     | E/E   | z/z   | lp/lp |       |
|                    | Vra2               | Slovakia    |                   | Vrable                      | D                       | Bay       | -            | -       | -        | A/a     | ov/bv   | KM0/KM0 | sb1/sb1 | C/C     | PRL/PRL | E/e     | z/z   | lp/lp |       |       |
|                    | CdY2               | Spain       |                   | Camino de las Yeseras       | D                       | Black     | -            | -       | -        | a/a     | N/A     | KM0/KM0 | sb1/sb1 | C/C     | PRL/PRL | E/E     | z/z   | lp/lp |       |       |
|                    | Zam09              | Portugal    | Zambujal          | D                           | Bay                     | -         | -            | -       | A/a      | ov/bv   | KM0/KM0 | sb1/sb1 | C/C     | PRL/PRL | E/E     | z/z     | lp/lp |       |       |       |
|                    | Zam10              | Portugal    | Zambujal          | D                           | Black                   | -         | -            | -       | a/a      | ov/bv   | KM0/KM0 | sb1/sb1 | C/C     | PRL/PRL | E/E     | z/z     | lp/lp |       |       |       |
|                    | Bronze_Age_middle  | Asia        | TAR1              | Cal. 1609-1436 BC           | Siberia                 | Tartas1   | D            | Bay     | -        | -       | A/a     | ov/bv   | KM0/KM0 | sb1/sb1 | C/C     | N/A     | E/E   | z/z   | lp/lp |       |
| TAR2               |                    |             | Siberia           |                             | Tartas1                 | D         | Chestnut     | -       | -        | -       | a/a     | ov/bv   | KM0/KM0 | sb1/sb1 | C/C     | N/A     | e/e   | z/z   | lp/lp |       |
| TAR4               |                    |             | Siberia           |                             | Tartas1                 | D         | Bay          | -       | -        | -       | A/a     | ov/bv   | KM0/KM0 | sb1/sb1 | C/C     | N/A     | E/E   | z/z   | lp/lp |       |
| TAR5               |                    |             | Siberia           |                             | Tartas1                 | D         | Bay          | Sabino  | -        | -       | A/a     | ov/bv   | KM0/KM0 | SB1/sb1 | C/C     | N/A     | E/E   | z/z   | lp/lp |       |
| TAR7               |                    |             | Siberia           |                             | Tartas1                 | D         | Black        | -       | -        | -       | a/a     | ov/bv   | KM0/KM0 | sb1/sb1 | C/C     | N/A     | E/E   | z/z   | lp/lp |       |
| TAR8               |                    |             | Siberia           |                             | Tartas1                 | D         | Bay          | -       | -        | -       | A/a     | ov/bv   | KM0/KM0 | sb1/sb1 | C/C     | N/A     | E/E   | z/z   | lp/lp |       |
| TAR10              |                    |             | Siberia           |                             | Tartas1                 | D         | Black        | -       | -        | -       | a/a     | ov/bv   | KM0/KM0 | sb1/sb1 | C/C     | N/A     | E/E   | z/z   | lp/lp |       |
| TAR11              |                    |             | Siberia           |                             | Tartas1                 | D         | Black        | -       | -        | -       | a/a     | ov/bv   | KM0/KM0 | sb1/sb1 | C/C     | N/A     | E/e   | z/z   | lp/lp |       |
| CIC1               |                    |             | Siberia           |                             | Cica                    | W         | Bay          | -       | -        | -       | A/a     | ov/bv   | KM0/KM0 | sb1/sb1 | C/C     | N/A     | E/E   | z/z   | lp/lp |       |
| CIC2               |                    |             | Siberia           |                             | Cica                    | W         | Bay          | Leopard | -        | -       | A/a     | ov/bv   | KM0/KM0 | sb1/sb1 | C/C     | N/A     | E/E   | z/z   | LP/lp |       |
| CIC3               |                    |             | Siberia           |                             | Cica                    | W         | Bay          | -       | -        | -       | A/a     | ov/bv   | KM0/KM0 | sb1/sb1 | C/C     | N/A     | E/E   | z/z   | lp/lp |       |
| CIC4               |                    | Siberia     | Cica              | D                           | Chestnut                | Tobiano   | -            | -       | -        | A/a     | ov/bv   | KM1/KM0 | sb1/sb1 | C/C     | N/A     | e/e     | z/z   | lp/lp |       |       |
| CIC6               |                    | Siberia     | Cica              | D                           | Chestnut                | Tobiano   | -            | -       | -        | A/a     | ov/bv   | KM1/KM0 | sb1/sb1 | C/C     | N/A     | e/e     | z/z   | lp/lp |       |       |
| CIC8               |                    | Siberia     | Cica              | D                           | Bay                     | Sabino    | -            | -       | -        | A/a     | ov/bv   | KM0/KM0 | SB1/sb1 | C/C     | N/A     | E/E     | z/z   | lp/lp |       |       |
| Europe/Asia(minor) |                    | Shi1        | cal. 895-795 BC   | Armenia                     | Shirakavan              | D         | Chestnut     | -       | -        | -       | A/a     | ov/bv   | KM0/KM0 | sb1/sb1 | C/C     | N/A     | e/e   | z/z   | lp/lp |       |
|                    |                    | Mic1        |                   | Moldova                     | Miciurín                | D         | Bay          | Tobiano | -        | -       | -       | A/a     | ov/bv   | KM1/KM0 | sb1/sb1 | C/C     | N/A   | E/E   | z/z   | lp/lp |
|                    |                    | Mic2        |                   | Moldova                     | Miciurín                | D         | Chestnut     | -       | -        | -       | A/a     | ov/bv   | KM0/KM0 | sb1/sb1 | C/C     | N/A     | e/e   | z/z   | lp/lp |       |
|                    |                    | Mic3        |                   | Moldova                     | Miciurín                | D         | Black        | -       | -        | -       | a/a     | ov/bv   | KM0/KM0 | sb1/sb1 | C/C     | N/A     | E/E   | z/z   | lp/lp |       |
|                    |                    | Mic4        |                   | Moldova                     | Miciurín                | D         | Bay          | -       | -        | -       | A/a     | ov/bv   | KM0/KM0 | sb1/sb1 | C/C     | N/A     | E/E   | z/z   | lp/lp |       |
|                    |                    | Mic5        |                   | Moldova                     | Miciurín                | D         | Bay          | Sabino  | -        | -       | -       | A/a     | ov/bv   | KM0/KM0 | SB1/sb1 | C/C     | N/A   | E/e   | z/z   | lp/lp |
|                    | Gar2               | Romania     |                   | Garbovat                    | D                       | Black     | -            | -       | -        | a/a     | ov/bv   | KM0/KM0 | sb1/sb1 | C/C     | N/A     | E/e     | z/z   | lp/lp |       |       |
|                    | Gar3               | Romania     |                   | Garbovat                    | D                       | Bay       | -            | -       | -        | A/a     | ov/bv   | KM0/KM0 | sb1/sb1 | C/C     | N/A     | E/E     | z/z   | lp/lp |       |       |
|                    | Gar4               | Romania     |                   | Garbovat                    | D                       | Bay       | -            | -       | -        | A/a     | ov/bv   | KM0/KM0 | sb1/sb1 | C/C     | N/A     | E/E     | z/z   | lp/lp |       |       |
|                    | Lch-1              | Armenia     |                   | Lchashen                    | D                       | Chestnut  | Sabino       | -       | -        | -       | N/A     | ov/bv   | KM0/KM0 | SB1/sb1 | C/C     | N/A     | e/e   | z/z   | lp/lp |       |
|                    | DuK2               | Hungary     |                   | Dunaujváros-Koszider        | D                       | Black     | -            | -       | -        | a/a     | ov/bv   | KM0/KM0 | sb1/sb1 | C/C     | PRL/PRL | E/E     | z/z   | lp/lp |       |       |
| TP4                | Georgia            | Tacht Perdá | D                 | Black                       | -                       | -         | -            | a/a     | ov/bv    | KM0/KM0 | sb1/sb1 | N/A     | PRL/PRL | E/e     | z/z     | lp/lp   |       |       |       |       |
| Iberia             | 39                 | 2200-800 BC | Spain             | El Acequion                 | D                       | Bay       | -            | -       | -        | A/a     | ov/bv   | KM0/KM0 | sb1/sb1 | C/C     | N/A     | E/E     | z/z   | lp/lp |       |       |
|                    | 40                 | 2200-800 BC | Spain             | El Acequion                 | D                       | Bay       | -            | -       | -        | A/a     | ov/bv   | KM0/KM0 | sb1/sb1 | C/C     | N/A     | E/E     | z/z   | lp/lp |       |       |
|                    | 22                 | 1350 BC     | Spain             | Cueva Rubia-Valmayor/Madrid | D                       | Black     | -            | -       | -        | a/a     | ov/bv   | KM0/KM0 | sb1/sb1 | N/A     | N/A     | E/E     | z/z   | lp/lp |       |       |
|                    | 24                 | 1350 BC     | Spain             | Cueva Rubia-Valmayor/Madrid | D                       | Bay       | -            | -       | -        | A/a     | ov/bv   | KM0/KM0 | sb1/sb1 | N/A     | N/A     | E/e     | z/z   | lp/lp |       |       |
|                    | 25                 | 1350 BC     | Spain             | Cueva Rubia-Valmayor/Madrid | D                       | Black     | -            | -       | -        | a/a     | ov/bv   | KM0/KM0 | sb1/sb1 | N/A     | N/A     | E/E     | z/z   | lp/lp |       |       |

Table S1: continued.

|          | Sample             | Age                | Location                  | Excavation                    | Wild/<br>Domestic                    | Phenotype       | Genotype     |          |          |         |       |         |         |         |         |         |         |       |       |       |
|----------|--------------------|--------------------|---------------------------|-------------------------------|--------------------------------------|-----------------|--------------|----------|----------|---------|-------|---------|---------|---------|---------|---------|---------|-------|-------|-------|
| Iron_Age | Asia               | BER2               | 900 BC                    | Siberia                       | Om-1                                 | D               | Bay          | -        | -        | A/A     | ov/ov | KM0/KM0 | sb1/sb1 | C/C     | N/A     | E/e     | Z/z     | lp/lp |       |       |
|          |                    | OKG1               | 400-300 BC                | Mongolia                      | Olon-Kurin-Gol 10                    | D               | Chestnut     | -        | -        | A/A     | ov/ov | KM0/KM0 | sb1/sb1 | C/C     | N/A     | E/e     | Z/z     | lp/lp |       |       |
|          |                    | OKG2               | 400-300 BC                | Mongolia                      | Olon-Kurin-Gol 10                    | D               | Bay          | Tobiano  | -        | -       | A/A   | ov/ov   | KM1/KM0 | sb1/sb1 | C/C     | N/A     | E/E     | Z/z   | lp/lp |       |
|          |                    | OKG3               | 400-300 BC                | Mongolia                      | Olon-Kurin-Gol 10                    | D               | Bay          | -        | Cream    | -       | A/A   | ov/ov   | KM0/KM0 | sb1/sb1 | C/gr    | N/A     | E/e     | Z/z   | lp/lp |       |
|          |                    | Bars1A             | 370-150 BC                | Siberia                       | Barsucij Log                         | D               | Bay          | Tobiano  | -        | -       | A/A   | ov/ov   | KM1/KM0 | sb1/sb1 | C/C     | N/A     | E/e     | Z/z   | lp/lp |       |
|          |                    | Bars1B             | 400-200 BC                | Siberia                       | Barsucij Log                         | D               | Bay          | Tobiano  | -        | -       | A/A   | ov/ov   | KM1/KM0 | sb1/sb1 | C/C     | N/A     | E/e     | Z/z   | lp/lp |       |
|          |                    | ARZ1-2             | 800 BC                    | Siberia                       | Arzan1                               | D               | Chestnut     | Leopard  | -        | -       | A/A   | ov/ov   | KM0/KM0 | sb1/sb1 | C/C     | N/A     | E/e     | Z/z   | LP/lp |       |
|          |                    | ARZ1-3             | 800 BC                    | Siberia                       | Arzan1                               | D               | Black        | -        | Silver   | -       | A/A   | ov/ov   | KM0/KM0 | sb1/sb1 | C/C     | N/A     | E/e     | Z/z   | lp/lp |       |
|          |                    | ARZ2-1             | 619-608 BC                | Siberia                       | Arzan2                               | D               | Bay          | -        | -        | -       | A/A   | ov/ov   | KM0/KM0 | sb1/sb1 | C/C     | N/A     | E/E     | Z/z   | lp/lp |       |
|          |                    | ARZ2-2             | 619-608 BC                | Siberia                       | Arzan2                               | D               | Black        | -        | -        | -       | A/A   | ov/ov   | KM0/KM0 | sb1/sb1 | C/C     | N/A     | E/e     | Z/z   | lp/lp |       |
|          |                    | ARZ2-3             | 619-608 BC                | Siberia                       | Arzan2                               | D               | Chestnut     | -        | -        | -       | A/A   | ov/ov   | KM0/KM0 | sb1/sb1 | C/C     | N/A     | E/e     | Z/z   | lp/lp |       |
|          |                    | ARZ2-5             | 619-608 BC                | Siberia                       | Arzan2                               | D               | Chestnut     | -        | -        | -       | A/A   | ov/ov   | KM0/KM0 | sb1/sb1 | C/C     | N/A     | E/e     | Z/z   | lp/lp |       |
|          |                    | ARZ2-6             | 619-608 BC                | Siberia                       | Arzan2                               | D               | Bay          | -        | -        | -       | A/A   | ov/ov   | KM0/KM0 | sb1/sb1 | C/C     | N/A     | E/e     | Z/z   | lp/lp |       |
|          |                    | ARZ2-7             | 619-608 BC                | Siberia                       | Arzan2                               | D               | Black        | -        | -        | -       | A/A   | ov/ov   | KM0/KM0 | sb1/sb1 | C/C     | N/A     | E/e     | Z/z   | lp/lp |       |
|          |                    | ARZ2-8             | 619-608 BC                | Siberia                       | Arzan2                               | D               | Bay          | -        | Cream    | -       | A/A   | ov/ov   | KM0/KM0 | sb1/sb1 | C/gr    | N/A     | E/e     | Z/z   | lp/lp |       |
|          |                    | ARZ2-9             | 619-608 BC                | Siberia                       | Arzan2                               | D               | Bay          | -        | Cream    | -       | A/A   | ov/ov   | KM0/KM0 | sb1/sb1 | C/gr    | N/A     | E/e     | Z/z   | lp/lp |       |
|          |                    | ARZ2-10            | 619-608 BC                | Siberia                       | Arzan2                               | D               | Chestnut     | Tobiano  | -        | -       | A/A   | ov/ov   | KM1/KM0 | sb1/sb1 | C/C     | N/A     | E/e     | Z/z   | lp/lp |       |
|          |                    | ARZ2-12            | 619-608 BC                | Siberia                       | Arzan2                               | D               | Chestnut     | -        | -        | -       | A/A   | ov/ov   | KM0/KM0 | sb1/sb1 | C/C     | N/A     | E/e     | Z/z   | lp/lp |       |
|          |                    | ARZ2-13            | 619-608 BC                | Siberia                       | Arzan2                               | D               | Chestnut     | -        | -        | -       | A/A   | ov/ov   | KM0/KM0 | sb1/sb1 | C/C     | N/A     | E/e     | Z/z   | lp/lp |       |
|          |                    | ARZ2-14            | 619-608 BC                | Siberia                       | Arzan2                               | D               | Bay          | -        | -        | -       | A/A   | ov/ov   | KM0/KM0 | sb1/sb1 | C/C     | N/A     | E/e     | Z/z   | lp/lp |       |
|          | Fen1               | 1000-800 BC        | China                     | Fengtai                       | D                                    | Bay             | Tobiano      | -        | -        | A/A     | ov/ov | KM1/KM0 | sb1/sb1 | C/C     | N/A     | E/E     | Z/z     | lp/lp |       |       |
|          | Fen2               | 1000-800 BC        | China                     | Fengtai                       | D                                    | Bay             | -            | -        | -        | A/A     | ov/ov | KM0/KM0 | sb1/sb1 | C/C     | N/A     | E/e     | Z/z     | lp/lp |       |       |
|          | Fen3               | 1000-800 BC        | China                     | Fengtai                       | D                                    | Bay             | -            | -        | -        | A/A     | ov/ov | KM0/KM0 | sb1/sb1 | C/C     | N/A     | E/E     | Z/z     | lp/lp |       |       |
|          | Fen4               | 1000-800 BC        | China                     | Fengtai                       | D                                    | Bay             | -            | -        | -        | A/A     | ov/ov | KM0/KM0 | sb1/sb1 | C/C     | N/A     | E/E     | Z/z     | lp/lp |       |       |
|          | Europe/Asia(minor) | Ois1               | 900 BC – 300 AD           | Belgium                       | Objectif sud                         | D               | Bay          | -        | -        | A/A     | N/A   | KM0/KM0 | N/A     | N/A     | PRL/PRL | E/E     | N/A     | lp/lp |       |       |
|          |                    | Rid1               | 800-600 BC                | Estonia                       | Ridala (Saaremaa Island)             | D               | Chestnut     | Tobiano  | -        | -       | A/A   | N/A     | KM1/KM0 | N/A     | N/A     | PRL/PRL | E/e     | N/A   | lp/lp |       |
|          |                    | Rid2               | 800-600 BC                | Estonia                       | Ridala (Saaremaa Island)             | D               | Chestnut     | Tobiano  | -        | -       | A/A   | N/A     | KM1/KM0 | N/A     | N/A     | PRL/PRL | E/e     | N/A   | lp/lp |       |
|          |                    | P108               | 2490 ± 70 BP              | Denmark                       | Kage Bugt udfor Solrød               | D               | Chestnut     | Tobiano  | -        | -       | A/A   | N/A     | KM1/KM0 | N/A     | N/A     | PRL/PRL | E/e     | N/A   | lp/lp |       |
|          |                    | P098               | 1-400 AD                  | Denmark                       | Hornborg                             | D               | Bay OR Black | Leopard  | -        | -       | N/A   | N/A     | KM0/KM0 | N/A     | C/C     | PRL/PRL | E/e     | N/A   | LP/lp |       |
|          | Iberia             | Vit4               | 550-425 BC<br>800 BC-6 AD | Spain                         | Vilaris                              | D               | Bay          | -        | -        | A/A     | ov/ov | KM0/KM0 | sb1/sb1 | C/C     | PRL/PRL | E/E     | Z/z     | lp/lp |       |       |
|          |                    |                    |                           | Spain                         | Soto de Medinilla -Valladolid        | D               | Black        | -        | -        | A/A     | ov/ov | KM0/KM0 | sb1/sb1 | C/C     | N/A     | E/E     | Z/z     | lp/lp |       |       |
|          | Medieval           | Europe/Asia(minor) | P082                      | 1000-1300 AD                  | Denmark                              | Viborg Sønderse | D            | Chestnut | -        | -       | A/A   | N/A     | KM0/KM0 | N/A     | N/A     | PRL/PRL | E/e     | N/A   | lp/lp |       |
|          |                    |                    | Ote2                      | 600-1300 AD                   | Estonia                              | Otepää          | D            | Chestnut | -        | -       | A/A   | N/A     | KM0/KM0 | N/A     | C/C     | PRL/PRL | E/e     | N/A   | lp/lp |       |
|          |                    |                    | Saa1                      | 600-1100 AD                   | Estonia                              | Saadjarve       | D            | Bay      | Tobiano  | -       | -     | A/A     | N/A     | KM1/KM0 | N/A     | N/A     | PRL/PRL | E/e   | N/A   | lp/lp |
|          |                    |                    | Soo1                      | 900-1300 AD                   | Estonia                              | Soontagana      | D            | Chestnut | -        | -       | -     | A/A     | N/A     | KM0/KM0 | N/A     | N/A     | PRL/PRL | E/e   | N/A   | lp/lp |
|          |                    |                    | Dee47                     | 400-600 AD (Migration period) | Germany                              | Deersheim       | D            | Bay      | -        | (Pearl) | -     | A/A     | N/A     | KM0/KM0 | sb1/sb1 | C/C     | PRL/prl | E/e   | Z/z   | lp/lp |
|          |                    |                    | Que40                     | 400-600 AD (Migration period) | Germany                              | Quedlinburg     | D            | Chestnut | Tobiano  | -       | -     | N/A     | N/A     | KM1/KM0 | sb1/sb1 | C/C     | PRL/PRL | E/e   | Z/z   | lp/lp |
|          |                    |                    | Rat13                     | 400-600 AD (Migration period) | Germany                              | Rathewitz       | D            | Black    | -        | -       | -     | A/A     | N/A     | KM0/KM0 | sb1/sb1 | C/C     | PRL/PRL | E/E   | Z/z   | lp/lp |
|          |                    |                    | Zor3                      | 400-600 AD (Migration period) | Germany                              | Zorbau          | D            | Chestnut | -        | -       | -     | A/A     | N/A     | KM0/KM0 | N/A     | C/C     | PRL/PRL | E/e   | Z/z   | lp/lp |
|          |                    |                    | Zwe2                      | 400-600 AD (Migration period) | Germany                              | Zwetendorf      | D            | Chestnut | -        | -       | -     | A/A     | N/A     | N/A     | sb1/sb1 | C/C     | PRL/PRL | E/e   | Z/z   | lp/lp |
| FoEq001  |                    |                    | 850-1050 AD               | Iceland                       | Hrossbrein frá Garósa 15223.         | D               | Bay          | -        | -        | -       | A/A   | N/A     | N/A     | sb1/sb1 | C/C     | N/A     | E/E     | Z/z   | lp/lp |       |
| FoEq002  |                    |                    | 850-1050 AD               | Iceland                       | Hrossbrein frá Garósa 15223.         | D               | Bay          | -        | -        | -       | A/A   | ov/ov   | KM0/KM0 | sb1/sb1 | C/C     | PRL/PRL | E/e     | Z/z   | lp/lp |       |
| FoEq003  |                    |                    | 850-1050 AD               | Iceland                       | Hrossbrein frá Garósa 15223.         | D               | Black        | -        | -        | -       | A/A   | ov/ov   | KM0/KM0 | sb1/sb1 | C/C     | PRL/PRL | E/e     | Z/z   | lp/lp |       |
| FoEq008  |                    |                    | 850-1050 AD               | Iceland                       | Hrossabein frá Hrollaugstöðum 15227. | D               | Bay          | -        | Cream    | -       | A/A   | ov/ov   | KM0/KM0 | sb1/sb1 | C/gr    | PRL/PRL | E/E     | Z/z   | lp/lp |       |
| FoEq009  |                    |                    | 850-1050 AD               | Iceland                       | 5856                                 | D               | Chestnut     | -        | -        | -       | N/A   | ov/ov   | KM0/KM0 | sb1/sb1 | C/C     | PRL/PRL | E/e     | Z/z   | lp/lp |       |
| FoEq023  |                    |                    | 850-1050 AD               | Iceland                       | 6419 b. Granagil.                    | D               | Chestnut     | -        | -        | -       | A/A   | ov/ov   | KM0/KM0 | sb1/sb1 | C/C     | PRL/PRL | E/e     | Z/z   | lp/lp |       |
| FoEq025  |                    |                    | 850-1050 AD               | Iceland                       | 6948 Núpár hjá Laxamýri.             | D               | Chestnut     | -        | -        | -       | A/A   | ov/ov   | KM0/KM0 | sb1/sb1 | C/C     | PRL/PRL | E/e     | Z/z   | lp/lp |       |
| FoEq033  |                    |                    | 850-1050 AD               | Iceland                       | Kolsholt 11.10.1958, 1958:117        | D               | Chestnut     | -        | (Silver) | -       | A/A   | N/A     | N/A     | sb1/sb1 | C/C     | PRL/PRL | E/e     | Z/z   | lp/lp |       |
| FoEq034  |                    |                    | 850-1050 AD               | Iceland                       | Kolsholt 11.10.1958, 1958:117        | D               | Chestnut     | -        | (Silver) | -       | A/A   | ov/ov   | KM0/KM0 | sb1/sb1 | C/C     | PRL/PRL | E/e     | Z/z   | lp/lp |       |
| FoEq042  |                    |                    | 850-1050 AD               | Iceland                       | Hrossbein. Ytra-Garóshom. 22.8.1958  | D               | Bay          | -        | -        | -       | N/A   | ov/ov   | KM0/KM0 | sb1/sb1 | C/C     | PRL/PRL | E/E     | Z/z   | lp/lp |       |
| FoEq044  |                    |                    | 850-1050 AD               | Iceland                       | Hrossbein. Ytra-Garóshom. 22.8.1958  | D               | Chestnut     | -        | -        | -       | A/A   | ov/ov   | KM0/KM0 | sb1/sb1 | C/C     | PRL/PRL | E/e     | Z/z   | lp/lp |       |
| FoEq047  |                    |                    | 850-1050 AD               | Iceland                       | Hrossbein. Ytra-Garóshom. 22.8.1958  | D               | Bay          | -        | -        | -       | A/A   | ov/ov   | KM0/KM0 | sb1/sb1 | C/C     | PRL/PRL | E/e     | Z/z   | lp/lp |       |
| FoEq052  |                    |                    | 850-1050 AD               | Iceland                       | Brandstaðir í Blönduhlíð 1967-81.    | D               | Chestnut     | -        | -        | -       | N/A   | N/A     | N/A     | N/A     | C/C     | PRL/PRL | E/e     | Z/z   | lp/lp |       |
| FoEq060  |                    |                    | 850-1050 AD               | Iceland                       | 11338A Hemla                         | D               | Chestnut     | -        | -        | -       | N/A   | N/A     | N/A     | N/A     | N/A     | PRL/PRL | E/e     | Z/z   | lp/lp |       |
| FoEq065  |                    |                    | 850-1050 AD               | Iceland                       | 11338A Hemla                         | D               | Chestnut     | -        | -        | -       | N/A   | N/A     | N/A     | N/A     | N/A     | N/A     | E/e     | Z/z   | lp/lp |       |
| FoEq066  |                    |                    | 850-1050 AD               | Iceland                       | Mörk #15 Landmannahreppur            | D               | Chestnut     | -        | -        | -       | N/A   | N/A     | N/A     | N/A     | N/A     | PRL/PRL | E/e     | Z/z   | lp/lp |       |
| FoEq068  |                    |                    | 850-1050 AD               | Iceland                       | Ytri-Neslönd 1960-46                 | D               | Black        | -        | -        | -       | A/A   | N/A     | KM0/KM0 | sb1/sb1 | C/C     | PRL/PRL | E/e     | Z/z   | lp/lp |       |
| FoEq071  |                    |                    | 850-1050 AD               | Iceland                       | Eyrarteigur 1995-358 (þórisárkuml)   | D               | Chestnut     | -        | -        | -       | N/A   | N/A     | N/A     | sb1/sb1 | N/A     | PRL/PRL | E/e     | Z/z   | lp/lp |       |



Table S1: continued.

|          | Sample              | Age             | Location     | Excavation           | Wid/<br>Domestic    | Phenotype |                 | Genotype          |         |         |         |         |         |         |       |       |       |
|----------|---------------------|-----------------|--------------|----------------------|---------------------|-----------|-----------------|-------------------|---------|---------|---------|---------|---------|---------|-------|-------|-------|
| Medieval | Europe/Asia (minor) | FoEq077         | 850-1050 AD  | Iceland              | Midsandfell 1982-57 | D         | Bay OR Black    | - -               | A/a     | N/A     | KMO/KMO | sb1/sb1 | C/C     | PRL/PRL | E/e   | z/z   | lp/lp |
|          |                     | Seb037          | 700-800 AD   | Slovakia             | Sebastovce          | D         | Black           | - (Pearl)         | a/a     | N/A     | KMO/KMO | sb1/sb1 | C/C     | PRL/pr1 | E/e   | z/z   | lp/lp |
|          |                     | Seb048          | 700-800 AD   | Slovakia             | Sebastovce          | D         | Bay             | - -               | A/a     | ov/bv   | KMO/KMO | sb1/sb1 | C/C     | PRL/PRL | E/e   | z/z   | lp/lp |
|          |                     | Seb052          | 700-800 AD   | Slovakia             | Sebastovce          | D         | Bay             | Tobiano + Leopard | A/a     | ov/bv   | KM1/KMO | sb1/sb1 | C/C     | PRL/PRL | E/e   | z/z   | LP/lp |
|          |                     | Seb058          | 700-800 AD   | Slovakia             | Sebastovce          | D         | Bay             | Tobiano           | A/a     | ov/bv   | KM1/KMO | sb1/sb1 | C/C     | PRL/PRL | E/e   | z/z   | lp/lp |
|          |                     | Seb067          | 700-800 AD   | Slovakia             | Sebastovce          | D         | Bay OR Black    | - -               | N/A     | N/A     | N/A     | sb1/sb1 | C/C     | PRL/PRL | E/E   | z/z   | lp/lp |
|          |                     | Seb080          | 700-800 AD   | Slovakia             | Sebastovce          | D         | Chestnut        | Leopard           | A/a     | ov/bv   | KMO/KMO | sb1/sb1 | C/C     | PRL/PRL | e/e   | z/z   | LP/lp |
|          |                     | Seb093          | 700-800 AD   | Slovakia             | Sebastovce          | D         | Black           | - -               | a/a     | ov/bv   | KMO/KMO | sb1/sb1 | C/C     | PRL/PRL | E/e   | z/z   | lp/lp |
|          |                     | Seb094          | 700-800 AD   | Slovakia             | Sebastovce          | D         | Chestnut        | - -               | A/a     | N/A     | N/A     | sb1/sb1 | C/C     | PRL/PRL | e/e   | z/z   | lp/lp |
|          |                     | Seb099          | 700-800 AD   | Slovakia             | Sebastovce          | D         | Bay             | - -               | A/a     | ov/bv   | KMO/KMO | sb1/sb1 | C/C     | PRL/PRL | E/e   | z/z   | lp/lp |
|          |                     | Seb131          | 700-800 AD   | Slovakia             | Sebastovce          | D         | Chestnut        | - -               | A/a     | ov/bv   | KMO/KMO | sb1/sb1 | C/C     | PRL/PRL | e/e   | z/z   | lp/lp |
|          |                     | Seb161          | 700-800 AD   | Slovakia             | Sebastovce          | D         | Chestnut        | - -               | A/a     | ov/bv   | KMO/KMO | sb1/sb1 | C/C     | PRL/PRL | e/e   | z/z   | lp/lp |
|          |                     | Seb230          | 700-800 AD   | Slovakia             | Sebastovce          | D         | Chestnut        | - -               | a/a     | N/A     | KMO/KMO | sb1/sb1 | C/C     | PRL/PRL | e/e   | z/z   | lp/lp |
|          |                     | Seb233          | 700-800 AD   | Slovakia             | Sebastovce          | D         | Chestnut        | - -               | A/a     | N/A     | N/A     | sb1/sb1 | C/C     | PRL/PRL | e/e   | z/z   | lp/lp |
|          |                     | Seb238          | 700-800 AD   | Slovakia             | Sebastovce          | D         | Black           | - Silver          | a/a     | N/A     | KMO/KMO | sb1/sb1 | C/C     | PRL/PRL | E/E   | Z/z   | lp/lp |
|          |                     | Upps01          | 600-800 AD   | Sweden               | Uppsala             | D         | Bay             | - -               | A/a     | N/A     | KMO/KMO | sb1/sb1 | N/A     | PRL/PRL | E/E   | z/z   | lp/lp |
|          |                     | Upps02          | 600-800 AD   | Sweden               | Uppsala             | D         | Bay OR Chestnut | Leopard           | A/A     | N/A     | KMO/KMO | sb1/sb1 | N/A     | PRL/PRL | N/A   | z/z   | LP/lp |
|          |                     | Upps03          | 600-800 AD   | Sweden               | Uppsala             | D         | Chestnut        | - -               | a/a     | N/A     | KMO/KMO | sb1/sb1 | N/A     | PRL/PRL | e/e   | z/z   | lp/lp |
|          |                     | Upps04          | 680-890 AD   | Sweden               | Uppsala             | D         | Bay             | - -               | A/A     | N/A     | KMO/KMO | sb1/sb1 | N/A     | PRL/PRL | E/E   | z/z   | lp/lp |
|          |                     | Upps05          | 1000-1150 AD | Sweden               | Uppsala             | D         | Chestnut        | - -               | A/a     | N/A     | KMO/KMO | sb1/sb1 | N/A     | PRL/PRL | e/e   | z/z   | lp/lp |
|          |                     | Upps06          | 800-1000 AD  | Sweden               | Uppsala             | D         | Bay             | - -               | A/A     | N/A     | KMO/KMO | sb1/sb1 | N/A     | PRL/PRL | E/E   | z/z   | lp/lp |
|          |                     | Upps07          | 870-1160 AD  | Sweden               | Uppsala             | D         | Chestnut        | - -               | a/a     | N/A     | KMO/KMO | sb1/sb1 | N/A     | PRL/PRL | e/e   | z/z   | lp/lp |
|          |                     | Upps08          | 1000-1200 AD | Sweden               | Uppsala             | D         | Bay             | - -               | A/a     | N/A     | KMO/KMO | sb1/sb1 | N/A     | PRL/PRL | E/e   | z/z   | lp/lp |
| Upps09   | 800-900 AD          | Sweden          | Uppsala      | D                    | Black               | - -       | a/a             | N/A               | KMO/KMO | sb1/sb1 | N/A     | PRL/PRL | E/E     | z/z     | lp/lp |       |       |
| Upps10   | 800-1050 AD         | Sweden          | Uppsala      | D                    | Black               | - -       | a/a             | N/A               | KMO/KMO | sb1/sb1 | N/A     | PRL/PRL | E/e     | z/z     | lp/lp |       |       |
| Iberia   | Buz1                | 500-600 AD      | Spain        | Buzanca 2 (Madrid)   | D                   | Bay       | - (Pearl)       | A/A               | N/A     | KMO/KMO | sb1/sb1 | C/C     | PRL/pr1 | E/e     | z/z   | lp/lp |       |
|          | 29                  | cal. 660-780 AD | Spain        | Mucientes-Valladolid | D                   | Chestnut  | - -             | a/a               | N/A     | KMO/KMO | sb1/sb1 | C/C     | N/A     | e/e     | z/z   | lp/lp |       |

Table S2: Primers used for the coat color SNPs amplification and Accession numbers of respective genes.

| <b>Locus/<br/>Gene</b> | <b>Primer name</b> | <b>Primer sequence 5'-3'</b> | <b>Primer length</b> | <b>Accession number</b> |
|------------------------|--------------------|------------------------------|----------------------|-------------------------|
| <i>KIT</i>             | Pa-KIT-13_F        | CGTCATGACTCATTCGTGAGAA       | 22                   | AY048669                |
|                        | Pa-KIT-13_R        | GCTCTGAAGGTAACAAGCAACTAA     | 24                   |                         |
| <i>KIT</i>             | Pa-KIT-16_F        | TTTAAATGGCTTTTCTTTTCTCC      | 22                   | AY874542                |
|                        | Pa-KIT-16_R        | TGCCAAGTCCCTATGAATACAC       | 22                   |                         |
| <i>MATP</i>            | Pa-MATP_F          | GCCATAACCATCACCATGATAG       | 22                   | AY187093                |
|                        | Pa-MATP_R          | GGCCCATCAATGAAGTCAG          | 19                   |                         |
| <i>MATP</i>            | Pa-Pearl_F         | ACTACCGCTACCTTTGCATCAG       | 22                   |                         |
|                        | Pa-Pearl_R         | TGAAATCTGTGAAGAAGAGCAT       | 22                   |                         |
| <i>MC1R</i>            | Pa-MC1R_F          | GCACTCACCCATGTACTACTTCAT     | 24                   | X98012                  |
|                        | Pa-MC1R_R          | GCACGTTGCTCATGCTCAC          | 19                   |                         |
| <i>PMEL</i>            | Pa-SILV_F          | TCCTTCTTCTTCTCCCAAATCA       | 22                   | DQ665301                |
|                        | Pa-SILV_R          | GAGCTGAGCCCTGCTTCATAA        | 21                   |                         |
| <i>ASIP</i>            | Pa-ASIP_F          | CAAGAAATCCAAAAAGATCAGC       | 22                   | AF288358                |
|                        | Pa-ASIP_R          | ATGAGAAGTCCAAGGCCTACCT       | 22                   |                         |
| <i>TRPM1</i>           | Pa-LP-rev_F        | GAGCTGCTGAACTGGGTATGT        | 21                   | XM_001492235            |
|                        | Pa-LP-rev_R        | TCTCCATGATCCCAAGCAAT         | 20                   |                         |
| <i>TRPM1</i>           | Pa-LP-for_F        | AGATCGAGCTGCTGAACTGG         | 20                   | XM_001492235            |
|                        | Pa-LP-for_R        | TCTCCATGATCCCAAGCAAT         | 20                   |                         |

Table S3: Allele frequencies in the observed sample over the time periods employed for the simulations analysis. The frequencies are slightly different than in the subsets employed in the temporal test of allele frequencies.

| Time periods | Observed frequencies |               |              |            |            |          |             |           |
|--------------|----------------------|---------------|--------------|------------|------------|----------|-------------|-----------|
|              | ASIP                 | KIT13-Tobiano | KIT16-Sabino | MATP-Cream | MATP-Pearl | MCIR     | PEML17-SILV | TRPM1-LP  |
| Allele       | <i>A</i>             | <i>KM0</i>    | <i>sb1</i>   | <i>C</i>   | <i>PRL</i> | <i>E</i> | <i>z</i>    | <i>lp</i> |
| <b>Ple</b>   | 0.967                | 1.000         | 1.000        | 1.000      | NA         | 1.000    | 1.000       | 0.867     |
| <b>MNe</b>   | 0.375                | 1.000         | 1.000        | 1.000      | 1.000      | 1.000    | 1.000       | 1.000     |
| <b>CoA</b>   | 0.325                | 0.948         | 0.964        | 1.000      | 1.000      | 0.646    | 1.000       | 0.875     |
| <b>EBA</b>   | 0.270                | 1.000         | 1.000        | 1.000      | 1.000      | 0.889    | 1.000       | 0.816     |
| <b>MBA</b>   | 0.476                | 1.000         | 1.000        | 1.000      | 1.000      | 0.609    | 1.000       | 0.964     |
| <b>LBA</b>   | 0.431                | 0.950         | 0.933        | 1.000      | 1.000      | 0.733    | 1.000       | 0.967     |
| <b>EIA</b>   | 0.522                | 0.896         | 1.000        | 0.952      | 1.000      | 0.396    | 0.976       | 0.979     |
| <b>IrA</b>   | 0.500                | 0.813         | 1.000        | 0.929      | 1.000      | 0.625    | 1.000       | 0.938     |
| <b>Med</b>   | 0.402                | 0.956         | 1.000        | 0.990      | 0.972      | 0.345    | 0.971       | 0.973     |

Table S4: Number of individuals for each detected phenotype per period and region. The last two rows summarize the number of phenotypes of the different regions per period as well as all phenotypes of this time period, respectively.

| Period<br>Sample size<br>Region                  | Plesitocene/Mesolithic (> 4000 BC)<br>N=28 |                        |        | Neolithic/Copper Age (4000-2700 BC)<br>N=29 |                        |        | Early Bronze Age (2100-1600 BC)<br>N=28 |                        |        | Mid/Late Bronze Age (1600-900 BC)<br>N=31 |                        |        | Iron Age (900 BC – 400 AD)<br>N=31 |                        |        | Middle Ages (< 400AD)<br>54 |                        |        |
|--------------------------------------------------|--------------------------------------------|------------------------|--------|---------------------------------------------|------------------------|--------|-----------------------------------------|------------------------|--------|-------------------------------------------|------------------------|--------|------------------------------------|------------------------|--------|-----------------------------|------------------------|--------|
|                                                  | Asia                                       | Europe/<br>Asia(minor) | Iberia | Asia                                        | Europe/<br>Asia(minor) | Iberia | Asia                                    | Europe/<br>Asia(minor) | Iberia | Asia                                      | Europe/<br>Asia(minor) | Iberia | Asia                               | Europe/<br>Asia(minor) | Iberia | Asia                        | Europe/<br>Asia(minor) | Iberia |
| Basic                                            | Pattern                                    | Dilution               |        |                                             |                        |        |                                         |                        |        |                                           |                        |        |                                    |                        |        |                             |                        |        |
| Bay                                              | -                                          | -                      | 5      | 9-10                                        | 4                      | 9      | 4-6                                     | 4                      | 6-8    | 1                                         | 5                      | 3      | 3                                  | 7                      | 1      | 1                           | 10-13                  | 1      |
| Bay                                              | Leopard                                    | -                      |        | 5                                           |                        | 2      | 2                                       |                        | 4      |                                           | 1                      |        |                                    |                        | 1      |                             | 0-1                    |        |
| Bay                                              | Sabino + Leopard                           | -                      |        |                                             |                        | 2      |                                         |                        |        |                                           |                        |        |                                    |                        |        |                             |                        |        |
| Bay                                              | Tobiano                                    | -                      |        |                                             |                        | 1      | 1                                       |                        |        |                                           |                        | 1      |                                    | 4                      |        |                             | 2                      |        |
| Bay                                              | Sabino                                     | -                      |        |                                             |                        |        |                                         |                        |        |                                           | 2                      | 1      |                                    |                        |        |                             | 1                      |        |
| Bay                                              | Tobiano + Leopard                          | -                      |        |                                             |                        |        |                                         |                        |        |                                           |                        |        |                                    |                        |        |                             | 1                      |        |
| Bay                                              | -                                          | Cream                  |        |                                             |                        |        |                                         |                        |        |                                           |                        |        |                                    | 3                      |        |                             | 1                      |        |
| Black                                            | -                                          | -                      |        | 2-3                                         | 2                      | 1      | 3-5                                     | 2                      | 3-5    | 2                                         | 3                      | 4      | 2                                  | 2                      |        | 1                           | 6-9                    |        |
| Black                                            | Leopard                                    | -                      |        |                                             |                        |        |                                         |                        | 3      |                                           |                        |        |                                    |                        |        |                             |                        |        |
| Black                                            | -                                          | Silver                 |        |                                             |                        |        |                                         |                        |        |                                           |                        |        |                                    | 1                      |        |                             | 1                      |        |
| Chestnut                                         | -                                          | -                      |        |                                             |                        | 2      |                                         |                        | 1      |                                           | 1                      | 2      |                                    | 5                      |        |                             | 24                     | 1      |
| Chestnut                                         | Tobiano                                    | -                      |        |                                             |                        |        |                                         |                        |        |                                           | 2                      |        |                                    | 1                      | 3      |                             | 1                      |        |
| Chestnut                                         | Sabino                                     | -                      |        |                                             |                        |        |                                         |                        |        |                                           |                        | 1      |                                    |                        |        |                             |                        |        |
| Chestnut                                         | Leopard                                    | -                      |        |                                             |                        |        |                                         |                        |        |                                           |                        |        |                                    | 1                      |        |                             | 1-2                    |        |
| Number of horses with spotted/diluted coat color |                                            |                        | 5      |                                             |                        | 8      |                                         |                        | 7      |                                           | 8                      |        |                                    | 14                     |        |                             | 8                      |        |
| Number of horses with basic coat color           |                                            |                        | 23     |                                             |                        | 21     |                                         |                        | 21     |                                           | 23                     |        |                                    | 17                     |        |                             | 46                     |        |
| Number of phenotypes                             |                                            |                        | 1      | 3                                           | 2                      | 6      | 4                                       | 2                      | 5      | 2                                         | 6                      | 6      | 2                                  | 8                      | 3      | 2                           | 10-11                  | 2      |
| Number of phenotypes for all regions/period      |                                            |                        | 3      |                                             |                        | 6      |                                         |                        | 5      |                                           | 8                      |        |                                    | 9                      |        |                             | 10-11                  |        |

Table S5: *P*-values for the temporal test of allele frequencies applied to pairs of consecutive subsets of samples with similar ages in the nine time periods analyzed in this study. NA refers to a test that was not applied because the frequencies stayed the same between the periods. The grouping of samples is shown in figure SU. The numbers separated by a diagonal are the counts of alleles (in the order as they appear in the first row) corresponding to the first temporal sample of the comparison; and the numbers below are the *p*-values of the temporal test for  $N_e$  of  $10^3$ ,  $10^4$  and  $10^5$ , respectively.

| Comparison        | Average age (1 <sup>st</sup> sample) | Nr. of generations | ASIP       | KIT13-Tobiano  | KIT16-Sabino   | MATP-Cream  | MATP-Pearl     | MCIR       | PEM17-SILV |
|-------------------|--------------------------------------|--------------------|------------|----------------|----------------|-------------|----------------|------------|------------|
|                   |                                      |                    | <i>A/a</i> | <i>KMO/KM1</i> | <i>sb1/SB1</i> | <i>C/cr</i> | <i>prl/Prl</i> | <i>E/e</i> | <i>z/Z</i> |
| <b>Ple vs MNe</b> | 17146                                | 2023               | 21/1       | 22/0           | 22/0           | 22/0        | -/-            | 20/0       | 22/0       |
|                   |                                      |                    | 0.0717     | -              | -              | -           | -              | -          | -          |
|                   |                                      |                    | 0.0011     | -              | -              | -           | -              | -          | -          |
|                   |                                      |                    | <0.0001    | -              | -              | -           | -              | -          |            |
| <b>MNe vs CoA</b> | 7029                                 | 311                | 4/10       | 14/0           | 14/0           | 14/0        | 2/0            | 14/0       | 14/0       |
|                   |                                      |                    | 0.7840     | 0.7616         | 0.8637         | -           | -              | 0.0572     | -          |
|                   |                                      |                    | 0.6801     | 0.4217         | 0.6180         | -           | -              | 0.0065     | -          |
|                   |                                      |                    | 0.6607     | 0.3613         | 0.5582         | -           | -              | 0.0035     | -          |
| <b>CoA vs EBA</b> | 5472                                 | 206                | 12/22      | 45/3           | 44/2           | 46/0        | 2/0            | 22/16      | 48/0       |
|                   |                                      |                    | 0.7599     | 0.4083         | 0.4871         | -           | -              | 0.0185     | -          |
|                   |                                      |                    | 0.6537     | 0.2965         | 0.3545         | -           | -              | 0.0009     | -          |
|                   |                                      |                    | 0.6347     | 0.2717         | 0.3204         | -           | -              | 0.0003     | -          |
| <b>EBA vs MBA</b> | 4442                                 | 105                | 7/17       | 24/0           | 24/0           | 24/0        | 4/0            | 24/0       | 24/0       |
|                   |                                      |                    | 0.3130     | -              | -              | -           | -              | 0.0088     | -          |
|                   |                                      |                    | 0.2190     | -              | -              | -           | -              | 0.0016     | -          |
|                   |                                      |                    | 0.2071     | -              | -              | -           | -              | 0.0012     | -          |
| <b>MBA vs LBA</b> | 3916                                 | 113                | 10/11      | 28/0           | 28/0           | 28/0        | 8/0            | 14/9       | 28/0       |
|                   |                                      |                    | 0.9472     | 0.4027         | 0.3555         | -           | -              | 0.2149     | -          |
|                   |                                      |                    | 0.9337     | 0.2873         | 0.2145         | -           | -              | 0.2316     | -          |
|                   |                                      |                    | 0.9314     | 0.2700         | 0.1913         | -           | -              | 0.3617     | -          |
| <b>LBA vs EIA</b> | 3352                                 | 146                | 25/29      | 53/3           | 52/4           | 48/0        | 2/0            | 42/14      | 56/0       |
|                   |                                      |                    | 0.8617     | 0.3347         | 0.3186         | 0.1732      | -              | 0.0027     | -          |
|                   |                                      |                    | 0.8013     | 0.2091         | 0.2109         | 0.1049      | -              | <0.0001    | -          |
|                   |                                      |                    | 0.7918     | 0.1861         | 0.1926         | 0.0908      | -              | <0.0001    | -          |
| <b>EIA vs IrA</b> | 2624                                 | 59                 | 12/16      | 26/4           | 24/0           | 22/2        | 6/0            | 8/22       | 24/0       |
|                   |                                      |                    | 0.7711     | 0.5391         | -              | 1.0000      | -              | 0.0317     | -          |
|                   |                                      |                    | 0.7472     | 0.5019         | -              | 1.0000      | -              | 0.0183     | -          |
|                   |                                      |                    | 0.7425     | 0.5004         | -              | 1.0000      | -              | 0.0166     | -          |
| <b>IrA vs Med</b> | 2330                                 | 239                | 7/7        | 11/3           | 12/0           | 11/1        | 2/0            | 9/5        | 12/0       |
|                   |                                      |                    | 0.7083     | 0.1217         | -              | 0.6628      | 1.0000         | 0.1767     | 0.9925     |
|                   |                                      |                    | 0.5813     | 0.0290         | -              | 0.2832      | 1.0000         | 0.0486     | 0.9969     |
|                   |                                      |                    | 0.5573     | 0.0218         | -              | 0.2273      | 1.0000         | 0.0340     | 0.9988     |
| <b>(Med)</b>      | 1134                                 |                    | 34/48      | 77/3           | 86/0           | 63/1        | 93/1           | 34/64      | 91/1       |

Table S6. *P*-values of comparisons of observed allele frequencies among contemporary locations. As obtained by means of a contingency table Chi-square test.

| <b>Time bin</b>       | <b>Locus</b><br><b>(alleles ancestral/derived)</b> | <b>Compared locations</b><br><b>(# of alleles, ancestral/derived)</b> | <b><i>P</i>-value</b> |
|-----------------------|----------------------------------------------------|-----------------------------------------------------------------------|-----------------------|
| <b>4000-3000 y BC</b> | ASIP (A/a)                                         | Germany (4/4); Siberia (7/3); Ukraine (6/7)                           | 0.049                 |
| <b>3000-2000 y BC</b> |                                                    | Turkey (5/15); Siberia (4/4)                                          | 0.204                 |
| <b>600-1200 y AD</b>  |                                                    | Estonia (4/2); Iceland (10/14); Slovakia; (9/17);<br>Sweden (9/11)    | 0.542                 |
| <b>600-1200 y AD</b>  | MC1R (E/e)                                         | Estonia (4/2); Iceland (11/27); Slovakia (10/18);<br>Sweden (10/8)    | 0.187                 |
| <b>600-1200 y AD</b>  | TRPM1 (lp/LP)                                      | Estonia (6/0); Iceland (38/0); Slovakia (28/2);<br>Sweden (19/1)      | 0.419                 |

Table S7. Priors and setting of the MCMC procedure employed for the final inference of selection coefficients and other parameters. \*Standard deviation of the jump distribution. % indicates that the S.D. corresponds to the indicated percentage of the available parameter range. \*\*The bounds of the time to the introduction of alleles were variable, and set between the oldest sample and the first appearance of the allele.

| <b>Setting/Operator</b>                           | <b>Value</b> | <b>Type of distribution</b> |
|---------------------------------------------------|--------------|-----------------------------|
| <b>Chains run</b>                                 | 20           | -                           |
| <b>Simulations per chain</b>                      | 20000        | -                           |
| <b>Interval for posterior probability storing</b> | 100          | -                           |
| <b>Probability of being introduced</b>            | 0.5          | -                           |
| <b>S.D. generation time*</b>                      | 0.1          | Normal                      |
| <b>S.D. <math>N_{e1}</math>*</b>                  | 5%           | Normal                      |
| <b>S.D. <math>N_{e2}</math>*</b>                  | 5%           | Normal                      |
| <b>S.D. Initial allele frequency*</b>             | 2.5%         | Normal                      |
| <b>S.D. Time to the allele introduction*</b>      | 2.5%         | Normal                      |
| <b>S.D. Selection coefficients*</b>               | 0.25%        | Normal                      |

  

| <b>Prior distributions</b>                            | <b>Probability distribution</b> | <b>Parameters</b>    |
|-------------------------------------------------------|---------------------------------|----------------------|
| <b>Selection Coefficients</b>                         | Exponential                     | [0.1]                |
| <b><math>N_{e1}</math>* (initial population size)</b> | Uniform                         | [100,100000]         |
| <b><math>N_{e2}</math>* (final population size)</b>   | Uniform                         | [ $N_{e1}$ ,1000000] |
| <b>Generation time</b>                                | Normal                          | M=5.0, $\sigma$ =0.5 |
| <b>Initial allele frequency</b>                       | Uniform                         | [0.0,1.0]            |
| <b>Time to the introduction of the allele</b>         | Uniform                         | [Min, Max]**         |
| <b>Time to the start of the demographic growth</b>    | Normal                          | [5600yBP,100]        |

## References

- 1 Schraiber, J. G., Evans, S. N. & Slatkin, M. Bayesian Inference of Natural Selection from Allele Frequency Time Series. *Genetics* **203**, 493-511, doi:10.1534/genetics.116.187278 (2016).
- 2 Bollback, J. P., York, T. L. & Nielsen, R. Estimation of 2Nes from temporal allele frequency data. *Genetics* **179**, 497-502, doi:10.1534/genetics.107.085019 (2008).
- 3 Malaspinas, A. S., Malaspinas, O., Evans, S. N. & Slatkin, M. Estimating allele age and selection coefficient from time-serial data. *Genetics* **192**, 599-607, doi:10.1534/genetics.112.140939 (2012).
- 4 Steinrücken, M., Bhaskar, A. & Song, Y. S. A novel spectral method for inferring general diploid selection from time series genetic data. *The Annals of Applied Statistics* **8**, 2203-2222, doi:10.1214/14-aos764 (2014).
- 5 Mathieson, I. & McVean, G. Estimating selection coefficients in spatially structured populations from time series data of allele frequencies. *Genetics* **193**, 973-984, doi:10.1534/genetics.112.147611 (2013).
- 6 Ronquist, F. *et al.* MrBayes 3.2: efficient Bayesian phylogenetic inference and model choice across a large model space. *Syst Biol* **61**, 539-542, doi:10.1093/sysbio/sys029 (2012).
- 7 Sandoval-Castellanos, E. Testing temporal changes in allele frequencies: a simulation approach. *Genet Res (Camb)* **92**, 309-320, doi:10.1017/S0016672310000339 (2010).
- 8 Ludwig, A. *et al.* Twenty-five thousand years of fluctuating selection on leopard complex spotting and congenital night blindness in horses. *Philos Trans R Soc Lond B Biol Sci* **370**, 20130386, doi:10.1098/rstb.2013.0386 (2015).
- 9 Nielsen, R. & Wakeley, J. Distinguishing Migration From Isolation: A Markov Chain Monte Carlo Approach. *Genetics* **158**, 885-896 (2001).
- 10 Wutke, S. *et al.* The Origin of Ambling Horses. *Current Biology* **26**, R1-R3, doi:10.1016/j.cub.2016.07.001 (2016).
